# Supplementary material for: A P53-Deficiency Gene Signature Predicts Recurrence Risk of Patients with Early-Stage Lung Adenocarcinoma
Source: Oxford University Press journal article supplement (doi:10.1158/1055-9965.epi-17-0478), 2017-11-15
Supplement: 10559965epi170478-sup-184196_3_supp_4328051_zxq9tj.xlsx [file 10559965epi170478-sup-184196_3_supp_4328051_zxq9tj.xlsx]

## Sheet: Suppl. Table S1
Suppl. Table S1: Lung adenocarcinoma microarray datasets used in this study.
GEO ID	Platform	Author	PMID	Survival	#Samples	#AD	#Stage I	#Stage II	#Stage III	#Stage IV	Smoking Status	P53 Status
GSE31210	GPL570	Okayama	22080568	RFS	246	226	168	58	0	0	Y	N
GSE8894	GPL570	Lee	19010856	RFS	138	63					N	N
GSE68465	GPL96	Shedden	18641660	RFS	462	443	150	251	28	12	Y	N
GSE13213	GPL6480	Tomida	19414676	RFS	117	117	79	13	25	0	Y	Y
GSE3141	GPL570	Bild	16273092	OS	111	58					N	N
GSE42127	GPL6884	Tang	23357979	OS	176	133	89	22	20	1	N	N
Suppl. Table S1.
Lung adenocarcinoma microarray datasets used in this study. For each dataset, its GEO ID, platform, author, PMID, survival information type, number of samples, cancer type, stage information, smoking status and P53 mutation status are provided.

## Sheet: Suppl. Table S2
Suppl. Table S2: P53-deficiency gene signature
Gene symbol	Coefficient	PValue	Weight.up	Weight.down
EDA2R	-3.09008	9.7937e-18	0	1
PLA2G10	-1.91774	1.12381e-15	0	1
TTK	2.87552	8.82937e-15	1	0
PDE4D	-2.81584	9.33922e-15	0	1
SASS6	5.97397	9.55022e-15	1	0
GPSM2	5.79681	1.11085e-14	1	0
MCM2	4.41342	1.23677e-14	1	0
WDHD1	4.36264	1.67412e-14	1	0
SGOL2	4.63126	2.49101e-14	1	0
KIAA1524	3.33703	2.65323e-14	1	0
ST6GALNAC4	-4.53211	2.77905e-14	0	1
TCF19	5.50962	3.12192e-14	1	0
C6orf167	5.54901	3.66943e-14	1	0
EME1	3.43709	3.89132e-14	1	0
CCDC18	4.62401	3.96715e-14	1	0
DCLRE1B	8.3699	4.40199e-14	1	0
RAD54L	3.02234	4.50192e-14	1	0
CDC7	4.6388	5.07252e-14	1	0
C1orf135	3.31719	6.17411e-14	1	0
DSN1	5.91813	6.22424e-14	1	0
NUP155	5.33704	9.11048e-14	1	0
C6orf182	6.72057	9.274e-14	1	0
CDCA5	3.13694	9.62528e-14	1	0
RFC4	4.6279	9.82782e-14	1	0
MCM6	4.93727	1.03587e-13	1	0
XRCC2	3.37774	1.05249e-13	1	0
STIL	4.10248	1.11055e-13	1	0
ANLN	2.90189	1.17076e-13	1	0
KIF2C	2.96766	1.24997e-13	1	0
RNF180	-3.36808	1.31519e-13	0	1
BRCA1	3.83571	1.64474e-13	1	0
CDCA8	3.59172	1.66203e-13	1	0
KIF4A	2.67664	1.98447e-13	1	0
C5orf34	3.56081	2.01862e-13	1	0
NCAPG2	4.27805	2.15982e-13	1	0
SIL1	-5.70536	2.48713e-13	0	1
CKAP2L	2.76121	2.85034e-13	1	0
NUP205	6.68363	3.08217e-13	1	0
YEATS2	6.34976	3.11186e-13	1	0
FIGNL1	5.38792	3.28762e-13	1	0
CHEK1	3.77617	3.34291e-13	1	0
RPH3AL	-4.07077	3.49659e-13	0	1
DONSON	5.62347	3.51943e-13	1	0
TPX2	2.74449	3.7764e-13	1	0
IGF2BP3	1.48746	4.08226e-13	1	0
CLSPN	2.559	4.29706e-13	1	0
C6orf138	-2.20736	4.46233e-13	0	1
TRIP13	3.00364	4.47221e-13	1	0
GPRC5C	-3.31273	5.04189e-13	0	1
BRIP1	3.00856	5.71232e-13	1	0
RPS27L	-5.82044	5.90536e-13	0	1
MELK	2.51436	6.78918e-13	1	0
TNFRSF10C	-4.01235	6.83995e-13	0	1
ATAD5	3.84031	7.22915e-13	1	0
RBL1	4.09074	8.37992e-13	1	0
MCM10	2.45764	8.7481e-13	1	0
POT1	6.39717	8.77997e-13	1	0
IFRD1	4.87635	9.73181e-13	1	0
TOPBP1	5.93167	1.01746e-12	1	0
GINS4	3.41891	1.07862e-12	1	0
TOP2A	2.71666	1.25341e-12	1	0
PRR11	2.30629	1.25911e-12	1	0
KIF15	2.8721	1.35746e-12	1	0
CST3	-4.83458	1.3786e-12	0	1
CENPI	2.37212	1.39267e-12	1	0
FAM111B	3.25822	1.49906e-12	1	0
HJURP	2.52681	1.85615e-12	1	0
BUB1	2.78391	1.86418e-12	1	0
MRPS36	-5.72442	1.88254e-12	0	1
DIAPH3	3.00929	2.18007e-12	1	0
CTSL2	2.04897	2.18836e-12	1	0
KIF23	2.71234	2.19838e-12	1	0
GINS1	3.11216	2.66994e-12	1	0
MTBP	3.90244	2.78093e-12	1	0
DEPDC1	2.38979	3.0111e-12	1	0
ZNHIT6	6.17548	3.30713e-12	1	0
RNF145	-4.14314	3.40337e-12	0	1
UBE2C	2.16154	3.90923e-12	1	0
CENPE	2.72569	4.14598e-12	1	0
NCAPH	2.63821	4.17213e-12	1	0
FAM54A	2.86174	4.55824e-12	1	0
ZNF367	3.85033	4.81915e-12	1	0
TRAIP	4.20931	4.94695e-12	1	0
SPC24	2.66851	5.00254e-12	1	0
BTG2	-3.30636	5.12213e-12	0	1
FBXO5	4.22643	5.16014e-12	1	0
HELLS	3.0446	5.24358e-12	1	0
POLQ	2.48077	5.37141e-12	1	0
SPATA18	-2.04552	5.37616e-12	0	1
DTL	3.28629	5.62857e-12	1	0
ABHD14A	-4.69862	5.67413e-12	0	1
SHCBP1	3.23851	5.83176e-12	1	0
CEP55	2.67281	5.86559e-12	1	0
NCAPD3	4.86667	6.0734e-12	1	0
ASF1B	3.24344	6.34601e-12	1	0
C15orf42	2.6777	6.99223e-12	1	0
NDC80	2.57066	6.99839e-12	1	0
CCNE2	2.8978	7.86533e-12	1	0
CDC6	2.60181	8.15856e-12	1	0
PSMD2	6.70102	8.71928e-12	1	0
ANKIB1	7.30273	8.76213e-12	1	0
KIFC1	2.81136	8.80511e-12	1	0
MYBL2	2.0501	9.58942e-12	1	0
SLC14A2	-1.07336	1.00031e-11	0	1
ORC1L	2.72789	1.02175e-11	1	0
RAD51AP1	2.85189	1.0821e-11	1	0
CACNA2D2	-1.36076	1.10128e-11	0	1
CD63	-5.59941	1.1301e-11	0	1
TTF2	6.15694	1.15184e-11	1	0
BUB1B	2.59979	1.15572e-11	1	0
TSPAN11	-1.57252	1.1657e-11	0	1
RFTN1	-3.32756	1.19308e-11	0	1
KIF11	3.04832	1.22964e-11	1	0
SKP2	3.86992	1.2506e-11	1	0
ZNF530	4.64402	1.29527e-11	1	0
CENPA	2.31658	1.30362e-11	1	0
ARHGAP26	-3.11967	1.33235e-11	0	1
USP1	7.04589	1.33937e-11	1	0
PLK4	3.22468	1.35703e-11	1	0
NOSTRIN	-2.57165	1.38324e-11	0	1
LRRC42	6.10999	1.38595e-11	1	0
TUBB	5.18766	1.50332e-11	1	0
GNAI3	7.46272	1.54406e-11	1	0
KIAA0141	-6.70738	1.59049e-11	0	1
WDR76	3.78716	1.66454e-11	1	0
TESC	-1.25898	1.70513e-11	0	1
DLGAP5	2.34524	1.97464e-11	1	0
MCM4	3.36936	2.01746e-11	1	0
SMC2	4.92099	2.08968e-11	1	0
GPR19	2.56638	2.10165e-11	1	0
DBF4	4.24029	2.15466e-11	1	0
MASTL	5.23845	2.26281e-11	1	0
CDC20	2.47541	2.26557e-11	1	0
SENP2	6.11071	2.3112e-11	1	0
C8orf4	-2.21843	2.33668e-11	0	1
MCM7	4.74696	2.42302e-11	1	0
MTF2	7.23955	2.55142e-11	1	0
CENPW	2.82901	3.05262e-11	1	0
CCNA2	2.66389	3.07107e-11	1	0
ATAD2	3.45662	3.11263e-11	1	0
MSRA	-4.61079	3.21952e-11	0	1
KIF20B	3.85341	3.25548e-11	1	0
SGOL1	2.40078	3.55637e-11	1	0
PCBD2	-5.5533	3.58632e-11	0	1
KIF18A	3.25508	3.5894e-11	1	0
C6orf150	3.47093	3.70863e-11	1	0
C11orf82	2.77114	3.74093e-11	1	0
RCC1	4.72888	4.00088e-11	1	0
OCA2	-1.54677	4.209e-11	0	1
SLC26A9	-1.30549	4.24588e-11	0	1
WDR62	2.41679	4.2843e-11	1	0
E2F2	3.09645	4.30188e-11	1	0
KIF18B	2.21147	4.3423e-11	1	0
CHAF1B	3.85917	4.55656e-11	1	0
ARL6IP6	5.28265	4.7714e-11	1	0
HLTF	4.39683	4.80754e-11	1	0
PSRC1	3.46391	4.89196e-11	1	0
HAT1	7.93955	4.9529e-11	1	0
SKA1	2.36089	5.02944e-11	1	0
ZNF695	1.55876	5.06236e-11	1	0
GPR133	-1.79771	5.12898e-11	0	1
FANCB	3.13626	5.18527e-11	1	0
CDC25A	2.72038	5.23251e-11	1	0
FANCD2	4.14937	5.26354e-11	1	0
WDR53	5.90004	5.45153e-11	1	0
PRMT8	-1.21589	5.61987e-11	0	1
AHCYL2	-2.22296	5.75202e-11	0	1
SNHG8	-4.2141	5.88351e-11	0	1
SFTPB	-1.51845	6.00746e-11	0	1
ASPM	2.30714	6.11165e-11	1	0
FBXO25	-5.12512	6.23625e-11	0	1
TNPO3	6.74456	7.2353e-11	1	0
FBXO45	5.08579	7.50739e-11	1	0
SPC25	2.55825	7.55291e-11	1	0
MPDU1	-5.21846	7.56558e-11	0	1
PSMC3IP	3.2659	7.66548e-11	1	0
TMEM66	-6.03555	7.84545e-11	0	1
ORC6L	2.75788	8.214e-11	1	0
E2F1	3.00162	8.30093e-11	1	0
NCAPG	2.45653	8.36071e-11	1	0
BRCA2	3.31194	9.86697e-11	1	0
BARD1	3.30866	1.02205e-10	0.999053	0
BFAR	-5.16991	1.02633e-10	0	0.998871
FAM72B	2.38071	1.11199e-10	0.99539	0
DEK	6.15934	1.19869e-10	0.992129	0
GLTSCR2	-4.73797	1.2185e-10	0	0.991417
PRKAB1	-4.74238	1.2319e-10	0	0.990942
LUZP6	6.27331	1.26498e-10	0.989792	0
INCENP	3.90731	1.32186e-10	0.987882	0
CSE1L	5.27944	1.36854e-10	0.986374	0
CHAF1A	4.07405	1.43327e-10	0.984367	0
GTSE1	2.44247	1.45559e-10	0.983696	0
DSCC1	2.8075	1.62218e-10	0.97899	0
CCNE1	2.35391	1.62882e-10	0.978813	0
TPI1P2	3.92155	1.67249e-10	0.977664	0
ZWINT	2.93825	1.87775e-10	0.972636	0
FAM64A	2.22428	1.87982e-10	0.972588	0
GINS3	3.8635	1.92006e-10	0.971669	0
DNMT1	4.59085	1.95897e-10	0.970797	0
DEPDC1B	2.16064	1.97599e-10	0.970422	0
FANCI	3.37642	2.06289e-10	0.968552	0
NCRNA00219	-4.03375	2.12305e-10	0	0.967304
SPAG7	-5.81574	2.15607e-10	0	0.966634
KPNA2	3.20302	2.21596e-10	0.965444	0
COL25A1	-0.875585	2.24796e-10	0	0.964821
TMEM48	4.18971	2.2667e-10	0.964461	0
CDK1	2.47068	2.28916e-10	0.964032	0
SPAG5	2.60067	2.29226e-10	0.963974	0
KIF14	2.18603	2.38755e-10	0.962205	0
KIF4B	2.75285	2.43151e-10	0.961412	0
FEN1	3.80721	2.54643e-10	0.959407	0
LMNB2	4.21849	2.56258e-10	0.959132	0
RRM2	2.2881	2.67622e-10	0.957248	0
CCNB2	2.44699	2.68178e-10	0.957158	0
CDC45	2.12956	2.73283e-10	0.956339	0
C6orf120	6.11394	2.96573e-10	0.952787	0
SPATS2L	3.6865	3.16974e-10	0.949898	0
SPDYE3	5.76349	3.22041e-10	0.949209	0
CALU	4.09623	3.34216e-10	0.947597	0
HPS3	5.25127	3.34585e-10	0.947549	0
EXO1	2.18547	3.38145e-10	0.94709	0
GLTPD2	-1.1294	3.39977e-10	0	0.946855
DDRGK1	-4.79403	3.64155e-10	0	0.943871
VAPA	-5.18733	3.67683e-10	0	0.943453
ERN2	-0.820664	3.75991e-10	0	0.942482
E2F8	2.51573	3.99597e-10	0.939838	0
CENPO	4.05939	4.24661e-10	0.937196	0
SCNN1G	-1.61701	4.57285e-10	0	0.933981
EZH2	3.17208	4.59622e-10	0.93376	0
ATP1B1	-2.59849	4.59932e-10	0	0.933731
STMN1	2.99401	4.61252e-10	0.933606	0
PLK1	2.39064	4.69232e-10	0.932861	0
KBTBD11	-2.33778	4.75402e-10	0	0.932294
PFKFB4	2.84301	4.76068e-10	0.932233	0
TMED6	-1.21319	4.79592e-10	0	0.931913
CASC5	2.14791	4.84977e-10	0.931428	0
TPT1	-4.10962	4.87743e-10	0	0.931181
CXCL10	1.69432	4.9423e-10	0.930607	0
MAD2L1	2.53951	5.03761e-10	0.929778	0
BTG1	-4.02849	5.05328e-10	0	0.929643
GJB1	-1.02131	5.09234e-10	0	0.929308
ISY1	8.11673	5.10603e-10	0.929192	0
SELENBP1	-2.15315	5.21596e-10	0	0.928267
LRRC27	-4.26829	5.25961e-10	0	0.927905
TMEM125	-3.13679	5.33502e-10	0	0.927286
SAT2	-4.40156	5.70901e-10	0	0.924344
CDKN2BAS	1.94543	6.09332e-10	0.921515	0
RAD51	2.52621	6.09898e-10	0.921474	0
UHRF1	2.37935	6.10296e-10	0.921446	0
NUSAP1	2.68614	6.30461e-10	0.920034	0
MSH6	5.38638	6.3815e-10	0.919508	0
PGC	-0.689534	6.41359e-10	0	0.91929
PPP1R3B	-2.9943	6.71277e-10	0	0.91731
CENPK	2.433	6.74601e-10	0.917095	0
CYFIP2	-3.07697	6.89954e-10	0	0.916118
CENPF	2.26488	7.18022e-10	0.914386	0
DHRS7B	-4.26167	7.27817e-10	0	0.913798
SCNN1B	-1.75379	7.52573e-10	0	0.912345
MCM8	3.35712	7.54464e-10	0.912236	0
C18orf54	3.22792	7.79186e-10	0.910836	0
KNTC1	3.13431	7.84894e-10	0.910519	0
TK1	2.44837	7.89505e-10	0.910265	0
RFC2	4.87152	7.95805e-10	0.909919	0
C9orf152	-1.82387	8.03042e-10	0	0.909526
MED11	-4.93733	8.13245e-10	0	0.908978
RECQL4	2.5424	8.42662e-10	0.907435	0
SENP5	6.43671	8.47713e-10	0.907175	0
RANGRF	-4.14196	8.66108e-10	0	0.906243
RHOBTB2	-2.24675	8.92944e-10	0	0.904918
CDT1	2.42484	9.148e-10	0.903867	0
C16orf75	3.23053	9.28723e-10	0.903211	0
ALS2CR4	4.83494	9.49965e-10	0.902229	0
ERCC6L	2.54558	9.93524e-10	0.900282	0
RHOB	-2.70015	1.01374e-09	0	0.899407
RNASEH2A	3.75406	1.0549e-09	0.897679	0
SKA3	2.27741	1.05727e-09	0.897582	0
ZW10	6.28215	1.07182e-09	0.896988	0
FANCG	4.31555	1.0748e-09	0.896867	0
CD81	-5.3264	1.09557e-09	0	0.896036
ARHGAP11A	2.61825	1.10817e-09	0.895539	0
SRD5A1	3.22943	1.12808e-09	0.894766	0
MSH2	5.20737	1.18798e-09	0.892519	0
CDKN3	1.97321	1.22849e-09	0.891063	0
E2F7	2.00129	1.23718e-09	0.890757	0
PRC1	2.60458	1.23773e-09	0.890738	0
ALG5	-4.66451	1.27547e-09	0	0.889433
FAAH2	-3.23457	1.28369e-09	0	0.889154
GEN1	4.07707	1.28499e-09	0.88911	0
MTUS1	-3.20261	1.31939e-09	0	0.887963
LMF1	-3.77783	1.32737e-09	0	0.887701
ASAH1	-3.79802	1.33137e-09	0	0.88757
POLA2	4.91257	1.35006e-09	0.886965	0
C1orf112	3.85234	1.37877e-09	0.886051	0
RBPMS	-3.06645	1.38439e-09	0	0.885874
FRAT1	-3.40486	1.39898e-09	0	0.885419
FOXM1	2.00765	1.4123e-09	0.885007	0
NUF2	2.02776	1.46163e-09	0.883516	0
HMMR	2.22011	1.48386e-09	0.882861	0
TSC22D2	3.94136	1.48422e-09	0.88285	0
OBFC2A	3.18804	1.48992e-09	0.882684	0
LETMD1	-5.0083	1.50117e-09	0	0.882357
CTDSP1	-6.87913	1.53287e-09	0	0.881449
LYPD5	2.07376	1.57081e-09	0.880388	0
BIRC5	1.89862	1.60771e-09	0.879379	0
KIAA0090	5.27153	1.63595e-09	0.878623	0
NEIL1	-2.56294	1.7025e-09	0	0.876891
AGA	-3.74467	1.73039e-09	0	0.876186
ADAM17	4.73175	1.74747e-09	0.875759	0
C10orf32	-4.86924	1.80342e-09	0	0.87439
SPIN4	3.58169	1.85906e-09	0.873071	0
DNAJC13	5.47962	1.91905e-09	0.871691	0
TMC4	-3.50056	1.92293e-09	0	0.871604
CCDC99	3.92104	1.96637e-09	0.870633	0
SLC22A3	-1.71284	2.00257e-09	0	0.869841
CASP2	6.04856	2.1798e-09	0.866158	0
HAUS2	6.60873	2.20221e-09	0.865714	0
FAM63A	-3.88842	2.20239e-09	0	0.865711
PIM3	-3.78281	2.20469e-09	0	0.865665
MLF1IP	2.68275	2.23823e-09	0.86501	0
GBP1	2.18939	2.30535e-09	0.863726	0
CENPN	3.46483	2.36427e-09	0.86263	0
HAGH	-4.79183	2.40523e-09	0	0.861884
RORB	-1.57626	2.49677e-09	0	0.860262
APOBEC3B	1.63845	2.50062e-09	0.860195	0
MAP3K7	6.09615	2.50384e-09	0.860139	0
ZMYM1	5.65863	2.52971e-09	0.859693	0
TENC1	-3.11565	2.55288e-09	0	0.859297
SCLT1	5.59825	2.63675e-09	0.857893	0
CENPQ	3.92705	2.71488e-09	0.856625	0
ARMC8	7.08459	2.72034e-09	0.856538	0
RAD54B	3.01404	2.72117e-09	0.856524	0
CYB5D2	-3.9504	2.74695e-09	0	0.856115
ZYG11A	1.21833	2.77698e-09	0.855643	0
RASD1	-1.32729	2.85584e-09	0	0.854427
SPINK1	-0.689101	2.86473e-09	0	0.854292
UBA6	5.59992	2.87993e-09	0.854062	0
GKN2	-0.843966	2.88061e-09	0	0.854051
NRAS	4.90637	2.88833e-09	0.853935	0
RECQL	4.01486	2.97573e-09	0.852641	0
FANCC	5.33494	3.01374e-09	0.852089	0
PSPH	3.22576	3.03656e-09	0.851762	0
STAT1	2.96578	3.0546e-09	0.851505	0
PKMYT1	2.17963	3.10169e-09	0.85084	0
NRM	3.74526	3.25578e-09	0.848734	0
ASPG	-1.09075	3.28647e-09	0	0.848327
ALDH3A2	-2.58096	3.36753e-09	0	0.847269
CAPN9	-1.08384	3.37469e-09	0	0.847177
TMEM194A	4.00139	3.45451e-09	0.846161	0
DHRS12	-4.35894	3.46078e-09	0	0.846083
FAM174A	-5.10828	3.56666e-09	0	0.844774
OGFRL1	3.14712	3.61414e-09	0.844199	0
PPAT	3.82689	3.62006e-09	0.844128	0
ALDH2	-3.09887	3.63529e-09	0	0.843946
NASP	4.83592	3.67876e-09	0.84343	0
KIAA0406	5.61986	3.73595e-09	0.84276	0
SLC16A11	-1.79099	3.79062e-09	0	0.842129
KLHL5	3.19682	3.83999e-09	0.841567	0
ERO1LB	-1.85044	3.89859e-09	0	0.840909
TACC2	-2.10695	4.02303e-09	0	0.839545
CHADL	-2.42111	4.11292e-09	0	0.838585
VPS36	-5.23619	4.1207e-09	0	0.838503
FAM174B	-2.66036	4.15153e-09	0	0.838179
NEK2	2.02569	4.16935e-09	0.837993	0
TUBG1	4.52019	4.28133e-09	0.836842	0
MCM5	4.02157	4.32787e-09	0.836373	0
MKI67	2.05815	4.33824e-09	0.836269	0
RBM28	5.06834	4.42929e-09	0.835367	0
AK1	-2.85081	4.84184e-09	0	0.831499
SEC11C	-2.31668	5.00729e-09	0	0.83004
C19orf40	3.42435	5.10826e-09	0.829173	0
GLMN	4.07977	5.19246e-09	0.828463	0
GMPS	4.14848	5.24832e-09	0.827998	0
TACC3	3.07348	5.27599e-09	0.82777	0
ESPL1	1.86788	5.29047e-09	0.827651	0
PIP4K2A	3.82417	5.29361e-09	0.827625	0
B3GALT2	-1.55361	5.48372e-09	0	0.826093
BICD1	2.77945	5.79325e-09	0.823708	0
SH3BP1	3.60049	5.806e-09	0.823612	0
TXNDC11	-4.44879	5.85307e-09	0	0.823262
CXCL11	1.45715	5.86666e-09	0.823161	0
IRX3	-1.83737	5.91873e-09	0	0.822777
CDKN2A	1.1692	6.01879e-09	0.822049	0
POFUT1	5.93974	6.12237e-09	0.821308	0
C21orf45	4.32134	6.12272e-09	0.821306	0
NUP93	6.7157	6.17004e-09	0.820971	0
CIT	-1.47544	6.23293e-09	0	0.820531
CDCA2	2.0273	6.26617e-09	0.8203	0
OIP5	1.99716	6.30604e-09	0.820024	0
FAM72A	2.0403	6.3973e-09	0.8194	0
TSPAN8	-0.988562	6.65376e-09	0	0.817693
IQGAP3	2.16136	6.846e-09	0.816456	0
KCNQ1	-1.81859	6.85894e-09	0	0.816374
FOXP1	-4.29773	6.91599e-09	0	0.816015
ALG1	-5.36639	7.18716e-09	0	0.814344
CAPN8	-1.66831	7.19613e-09	0	0.81429
CASP8AP2	4.67877	7.28897e-09	0.813733	0
PSMD12	5.65771	7.29092e-09	0.813722	0
AGPS	6.14129	7.44275e-09	0.812827	0
FAM83D	2.17443	7.49784e-09	0.812506	0
HSD17B4	-4.49253	7.57333e-09	0	0.812071
ATP2C1	4.78027	7.73424e-09	0.811158	0
TYMS	2.63036	7.888e-09	0.810303	0
HSD17B11	-3.36742	7.98687e-09	0	0.809762
FBXW4	-4.54332	8.0084e-09	0	0.809645
NEDD4L	-2.95484	8.05723e-09	0	0.809381
PMM1	-3.06067	8.07741e-09	0	0.809273
KCNG3	1.44007	8.29461e-09	0.80812	0
WDR3	4.38399	8.6544e-09	0.806276	0
COX7C	-4.16171	8.70475e-09	0	0.806024
RSRC1	4.21494	8.74019e-09	0.805848	0
SLC7A2	-1.08346	8.96748e-09	0	0.804733
FAM72D	1.87656	8.99087e-09	0.80462	0
DUS4L	4.42719	9.17458e-09	0.803741	0
FCHO2	-3.49771	9.25062e-09	0	0.803383
EPHX2	-2.26568	9.33833e-09	0	0.802973
ATP2C2	-1.87494	9.66383e-09	0	0.801485
NDFIP1	-5.37544	9.70909e-09	0	0.801282
DEXI	-5.33989	9.82112e-09	0	0.800784
MLPH	-2.14615	9.94744e-09	0	0.800229
PARM1	-1.81209	1.03415e-08	0	0.798542
CCT5	4.15227	1.04632e-08	0.798034	0
GNA13	5.07007	1.04835e-08	0.79795	0
REEP5	-5.37879	1.0489e-08	0	0.797927
FAF1	6.52644	1.05234e-08	0.797784	0
C16orf89	-1.10017	1.08109e-08	0	0.796614
C13orf34	3.81459	1.0997e-08	0.795873	0
DVL3	5.35966	1.11816e-08	0.79515	0
ENAM	-1.06932	1.14264e-08	0	0.794209
PAK3	-1.1102	1.14613e-08	0	0.794077
RPL3	-4.37559	1.15482e-08	0	0.793749
C22orf32	-4.04077	1.19633e-08	0	0.792215
CCDC109B	2.83241	1.20942e-08	0.791742	0
HPRT1	3.69961	1.21e-08	0.791721	0
TXNDC15	-5.12769	1.2301e-08	0	0.791006
PHF19	3.6942	1.26119e-08	0.789922	0
TFCP2L1	-1.54794	1.29379e-08	0	0.788814
ELP3	-4.66785	1.30917e-08	0	0.7883
PATL1	5.1126	1.31304e-08	0.788172	0
CENPL	3.78807	1.31498e-08	0.788108	0
SMC6	4.87132	1.33891e-08	0.787325	0
KHDRBS3	-1.73871	1.39956e-08	0	0.785401
AURKB	1.8342	1.42085e-08	0.784745	0
C9orf53	4.22698	1.4257e-08	0.784597	0
NDUFAF1	-5.00576	1.47601e-08	0	0.783091
KIAA0226	4.84501	1.49129e-08	0.782644	0
ZNF229	1.26345	1.49137e-08	0.782641	0
RPL13A	-3.76875	1.50882e-08	0	0.782136
POLE2	1.99487	1.50961e-08	0.782114	0
CDCA4	3.19141	1.50991e-08	0.782105	0
CAPZA1	5.46136	1.51188e-08	0.782048	0
FKBP11	-2.60426	1.52668e-08	0	0.781625
SLC2A1	1.72382	1.61142e-08	0.779279	0
LOC144486	2.8782	1.61374e-08	0.779217	0
SKA2	3.92545	1.64365e-08	0.778419	0
ATP8B1	-2.93375	1.67142e-08	0	0.777691
AQP7	-1.12652	1.69162e-08	0	0.77717
MOV10	4.64115	1.69194e-08	0.777162	0
TBC1D2	-2.78487	1.7077e-08	0	0.776759
VPS37A	-3.84472	1.7129e-08	0	0.776627
EIF4B	-5.14313	1.75676e-08	0	0.775529
ZDHHC1	-3.47697	1.80149e-08	0	0.774437
SLC4A1AP	7.00972	1.80897e-08	0.774257	0
TSC22D1	-3.56548	1.81124e-08	0	0.774202
CCNF	2.87639	1.86209e-08	0.773	0
TMEM163	-1.58786	1.94325e-08	0	0.771147
B9D2	-3.78468	1.95168e-08	0	0.770959
SMC4	3.42069	1.96544e-08	0.770654	0
EIF2C3	4.74743	1.98642e-08	0.770193	0
WBSCR17	-1.45998	2.06548e-08	0	0.768498
C17orf53	2.24178	2.0753e-08	0.768292	0
DBR1	6.39298	2.07938e-08	0.768207	0
PHF13	5.18829	2.10484e-08	0.767678	0
MRPS25	-3.25753	2.134e-08	0	0.767081
MCOLN3	1.41139	2.14046e-08	0.766949	0
ERBB3	-2.96386	2.16266e-08	0	0.766501
STARD10	-2.72582	2.17192e-08	0	0.766316
ABHD14B	-3.77684	2.18087e-08	0	0.766137
EIF2AK2	3.79586	2.18183e-08	0.766118	0
PRIM1	2.72784	2.19047e-08	0.765946	0
LRRC40	4.81925	2.22378e-08	0.765291	0
LDHD	-1.69181	2.23245e-08	0	0.765122
ACOX2	-2.41112	2.25038e-08	0	0.764774
RHEBL1	2.34194	2.25283e-08	0.764727	0
MAD2L2	3.6488	2.28256e-08	0.764158	0
RPS23	-3.72692	2.28655e-08	0	0.764082
GEMIN8	-4.73743	2.34469e-08	0	0.762992
KCNK1	-2.49396	2.37665e-08	0	0.762403
FBXO43	2.28486	2.38128e-08	0.762319	0
ATOH8	-1.26025	2.41628e-08	0	0.761685
CABLES1	-2.26011	2.4243e-08	0	0.761541
ATP11A	-2.10491	2.42864e-08	0	0.761464
ATG3	6.67475	2.46517e-08	0.760815	0
PSMC2	5.74528	2.47516e-08	0.76064	0
CHKB	-3.62583	2.51363e-08	0	0.75997
LOC400759	1.83354	2.51878e-08	0.759881	0
CNTLN	2.3508	2.55006e-08	0.759345	0
TROAP	1.67249	2.573e-08	0.758956	0
DUSP5P	1.43496	2.61151e-08	0.758311	0
WASF1	2.43991	2.62654e-08	0.758062	0
GLT25D1	3.92612	2.65162e-08	0.757649	0
TEX264	-4.74431	2.66022e-08	0	0.757508
SLC46A2	-1.27973	2.66549e-08	0	0.757422
TBCCD1	5.27313	2.69482e-08	0.756947	0
ARHGAP11B	2.06668	2.70149e-08	0.75684	0
RDM1	1.70721	2.71216e-08	0.756668	0
MAP6D1	2.35584	2.72196e-08	0.756512	0
C7orf49	5.01701	2.73675e-08	0.756277	0
QTRTD1	5.64561	2.75626e-08	0.755968	0
EPR1	1.72426	2.75648e-08	0.755964	0
ZNF131	4.94361	2.78871e-08	0.75546	0
NR4A1	-1.61064	2.83033e-08	0	0.754816
TFRC	2.45376	2.85224e-08	0.754481	0
PHPT1	-3.22031	2.88704e-08	0	0.753955
PAPPA	-1.37628	2.95101e-08	0	0.753003
BTD	-4.36446	2.96436e-08	0	0.752807
SHOX2	1.3667	2.98168e-08	0.752554	0
AP2M1	5.46595	3.0264e-08	0.751907	0
SLC25A38	-5.72536	3.11329e-08	0	0.750678
IL1RAP	2.28683	3.1243e-08	0.750525	0
BLM	2.59255	3.14021e-08	0.750304	0
CDH3	1.38522	3.1448e-08	0.750241	0
PARN	-4.51548	3.19686e-08	0	0.749528
RHOBTB3	2.42101	3.19955e-08	0.749491	0
SMC1B	1.05922	3.22465e-08	0.749152	0
ZWILCH	3.79151	3.26426e-08	0.748621	0
DHX36	5.11587	3.27775e-08	0.748442	0
FZD3	-2.50284	3.30192e-08	0	0.748123
TMEM80	-2.68943	3.3824e-08	0	0.747077
BTF3	-4.40077	3.3967e-08	0	0.746894
MMD	2.34238	3.41859e-08	0.746615	0
C3orf19	-7.48476	3.49945e-08	0	0.7456
ORC3L	4.67559	3.55423e-08	0.744925	0
FAM105B	4.735	3.59443e-08	0.744437	0
ATP13A3	3.72396	3.63995e-08	0.74389	0
MDM2	-3.90856	3.6425e-08	0	0.74386
TFF3	-0.819316	3.65273e-08	0	0.743738
GINS2	2.18135	3.7401e-08	0.742712	0
AEN	-4.07497	3.75794e-08	0	0.742505
TRIM13	-4.67962	3.8159e-08	0	0.74184
CDK2AP2	-2.82872	3.84342e-08	0	0.741528
KIF24	2.71144	3.87668e-08	0.741154	0
POLR1D	-5.23975	3.9564e-08	0	0.74027
TTPAL	4.81468	3.97112e-08	0.740109	0
ERP29	-4.10817	4.01263e-08	0	0.739657
FLJ42875	-1.24391	4.05345e-08	0	0.739218
TMBIM4	-4.09635	4.05566e-08	0	0.739194
RPAIN	-4.04172	4.06569e-08	0	0.739087
SNRNP40	5.76267	4.09629e-08	0.738761	0
RND1	-1.39064	4.22394e-08	0	0.737428
TMEM132D	-0.91871	4.22596e-08	0	0.737408
AFF3	-1.36894	4.29493e-08	0	0.736704
TMEM38B	2.67926	4.32473e-08	0.736404	0
ZNF107	3.29111	4.36189e-08	0.736033	0
LMBR1	4.95116	4.36591e-08	0.735993	0
TMEM91	-2.31631	4.51782e-08	0	0.734507
ARRDC2	-3.61782	4.53596e-08	0	0.734333
GRAMD4	-3.09553	4.53957e-08	0	0.734299
B3GNT8	-1.68826	4.54074e-08	0	0.734287
RACGAP1	2.53578	4.59988e-08	0.733725	0
RLF	5.42103	4.68541e-08	0.732925	0
GSS	5.25673	4.77084e-08	0.732141	0
NME5	-1.61428	4.78547e-08	0	0.732008
SLC48A1	-3.92828	4.84236e-08	0	0.731494
C1orf95	-0.899442	4.93596e-08	0	0.730663
KCNJ11	-1.60713	4.97336e-08	0	0.730335
TMEM108	-1.52076	5.00393e-08	0	0.730069
LSG1	4.9432	5.01136e-08	0.730004	0
FGFR1OP	4.34985	5.01665e-08	0.729959	0
ZNF256	2.35086	5.07442e-08	0.729461	0
C1orf144	7.79074	5.07568e-08	0.729451	0
C7orf70	4.73778	5.08032e-08	0.729411	0
SKAP2	3.45527	5.10271e-08	0.72922	0
UFC1	-4.47835	5.11265e-08	0	0.729135
RAB5B	-6.09967	5.18066e-08	0	0.728561
CCL8	1.40787	5.23282e-08	0.728126	0
NAA50	4.6771	5.26254e-08	0.72788	0
GSG2	2.19368	5.27263e-08	0.727797	0
SLC25A13	4.17729	5.29613e-08	0.727604	0
C19orf63	-3.9602	5.31974e-08	0	0.727411
POC1A	2.82295	5.43415e-08	0.726487	0
ZKSCAN5	6.53712	5.55996e-08	0.725493	0
FOS	-1.84863	5.60214e-08	0	0.725165
KIAA0430	-4.90776	5.62066e-08	0	0.725021
ETS2	-2.79475	5.62855e-08	0	0.72496
MTIF3	-5.51382	5.63212e-08	0	0.724933
CCDC132	5.69873	5.64185e-08	0.724858	0
ZNF525	3.92515	5.66872e-08	0.724651	0
SCGB3A2	-0.729355	5.75722e-08	0	0.723979
ELL3	-2.91534	6.01387e-08	0	0.722085
SLC7A8	-1.74193	6.07744e-08	0	0.721628
PDK3	2.7567	6.20261e-08	0.720743	0
LARGE	-1.86594	6.24358e-08	0	0.720457
RPL39L	1.73249	6.34434e-08	0.719761	0
BARX1	-0.60916	6.34725e-08	0	0.719741
RAET1K	2.36563	6.38728e-08	0.719468	0
SNX8	3.29555	6.38878e-08	0.719458	0
DNMT3B	2.16935	6.42355e-08	0.719223	0
PDHB	-6.01393	6.48042e-08	0	0.71884
RAP1GAP	-1.5347	6.50123e-08	0	0.7187
SIKE1	5.27755	6.52201e-08	0.718562	0
RORC	-2.13377	6.52406e-08	0	0.718548
XPO1	5.95314	6.52463e-08	0.718544	0
SLC16A1	1.64153	6.52966e-08	0.718511	0
METTL8	4.95786	6.55358e-08	0.718352	0
TUBA1B	3.78599	6.63974e-08	0.717785	0
CYP2B7P1	-1.01352	6.72029e-08	0	0.717261
PIGW	4.5193	6.78363e-08	0.716854	0
C8orf42	-2.49067	6.82443e-08	0	0.716593
C5orf51	4.9079	6.83322e-08	0.716537	0
EYS	-1.45542	6.86068e-08	0	0.716363
VRK2	4.87311	6.86217e-08	0.716354	0
RAB40C	-3.14955	6.86252e-08	0	0.716352
CDCA3	1.84493	6.9612e-08	0.715732	0
ANG	-2.12519	6.97536e-08	0	0.715643
TMEM9B	-5.20019	6.99047e-08	0	0.715549
MFN1	4.74768	7.04173e-08	0.715232	0
ISCU	-5.86156	7.0733e-08	0	0.715038
LMNB1	2.61536	7.13621e-08	0.714653	0
TOB1	-2.51051	7.21354e-08	0	0.714185
ZZZ3	5.72004	7.23945e-08	0.714029	0
SLC44A4	-1.81429	7.34478e-08	0	0.713402
ODC1	-1.59409	7.39962e-08	0	0.713079
AMN	-1.10383	7.44177e-08	0	0.712832
GADD45G	-1.80417	7.45255e-08	0	0.712769
ZC3H7A	-5.729	7.45769e-08	0	0.71274
FYTTD1	4.65087	7.46939e-08	0.712671	0
DPH2	5.20503	7.49857e-08	0.712502	0
BRIX1	3.7861	7.61437e-08	0.711837	0
PRKDC	3.27572	7.88823e-08	0.710302	0
SHPK	-4.17705	7.90514e-08	0	0.710209
MED10	4.01683	7.91697e-08	0.710144	0
AQP3	-1.29142	8.17347e-08	0	0.708759
PEG10	0.987385	8.18736e-08	0.708686	0
ZDHHC16	-4.28198	8.30586e-08	0	0.708062
GREB1L	1.11395	8.37349e-08	0.707709	0
MFI2	1.31808	8.39992e-08	0.707572	0
ASAP1	3.3193	8.41362e-08	0.707502	0
C5orf22	4.6695	8.44943e-08	0.707317	0
R3HDM1	5.209	8.79941e-08	0.705555	0
TARS	3.54593	8.87385e-08	0.705189	0
SUCLG2	-3.80571	8.88906e-08	0	0.705114
ATP5G2	-4.08964	9.00774e-08	0	0.704538
EIF4EBP3	-2.48488	9.02342e-08	0	0.704463
GPR98	-1.2217	9.02612e-08	0	0.70445
FBXO16	-2.53159	9.02804e-08	0	0.704441
CD55	-1.9065	9.04756e-08	0	0.704347
CDK2	3.91417	9.11228e-08	0.704037	0
SUV39H2	3.72223	9.11727e-08	0.704014	0
UBE2T	2.09281	9.19938e-08	0.703624	0
SEC23A	3.15809	9.20808e-08	0.703583	0
CTNNBL1	5.28226	9.21056e-08	0.703571	0
PAK2	4.75164	9.23775e-08	0.703443	0
RPS9	-3.47693	9.24719e-08	0	0.703399
KLHDC9	-2.03462	9.36665e-08	0	0.702842
ZNF114	1.06646	9.42408e-08	0.702576	0
AIM1	1.78773	9.5025e-08	0.702216	0
FAM177B	-0.972962	9.85435e-08	0	0.700637
KIAA0947	4.32613	9.87542e-08	0.700544	0
NCEH1	2.6259	9.90583e-08	0.700411	0
FAM83E	-2.01222	1.00592e-07	0	0.699744
HMGB2	3.08015	1.01411e-07	0.699392	0
VAMP2	-4.07518	1.016e-07	0	0.699311
TRIM59	2.70903	1.03878e-07	0.698347	0
SLC9A7	2.14783	1.04252e-07	0.698191	0
ZBTB2	6.36823	1.04303e-07	0.69817	0
CCDC15	2.34839	1.0431e-07	0.698168	0
GAS2L3	1.82544	1.04365e-07	0.698145	0
PHYHD1	-1.29527	1.0465e-07	0	0.698026
CATSPER3	-2.57269	1.05526e-07	0	0.697664
C19orf57	1.95895	1.05861e-07	0.697526	0
RRAGC	3.90268	1.05901e-07	0.69751	0
PNPLA7	-1.5028	1.06803e-07	0	0.697142
ZIK1	1.63552	1.08297e-07	0.696538	0
SIAE	-2.39615	1.10808e-07	0	0.695543
PIK3CA	4.24615	1.10959e-07	0.695484	0
CORO1C	3.67358	1.11081e-07	0.695436	0
COG5	4.86038	1.11144e-07	0.695411	0
DUSP22	-4.54486	1.11562e-07	0	0.695248
RAB17	-2.90483	1.12099e-07	0	0.69504
OPA1	4.61309	1.13133e-07	0.694641	0
DNAJC2	4.8373	1.13338e-07	0.694562	0
GEM	-1.7553	1.13701e-07	0	0.694423
SNRNP35	-5.19873	1.15563e-07	0	0.693718
CAPN6	-0.871377	1.19013e-07	0	0.69244
RQCD1	4.91463	1.19725e-07	0.692182	0
TST	-2.35083	1.19955e-07	0	0.692098
C1orf59	1.81502	1.21376e-07	0.691587	0
RPA3	3.56449	1.24301e-07	0.690552	0
C15orf41	3.46966	1.24952e-07	0.690326	0
RNASE4	-2.14993	1.26524e-07	0	0.689783
CKAP2	3.21091	1.26733e-07	0.689711	0
IL27	2.25371	1.26997e-07	0.689621	0
C10orf55	1.7154	1.2934e-07	0.688827	0
HBS1L	5.12296	1.30615e-07	0.688401	0
VRK1	3.28195	1.31488e-07	0.688112	0
CBL	3.57273	1.34073e-07	0.687266	0
LPL	-1.17602	1.37776e-07	0	0.686083
PCYT1A	4.19155	1.37867e-07	0.686054	0
DR1	4.72822	1.38012e-07	0.686008	0
C1orf27	-4.26959	1.39059e-07	0	0.68568
NOL9	4.51287	1.39083e-07	0.685672	0
C1orf210	-3.04924	1.39444e-07	0	0.68556
CCT6A	4.38268	1.39928e-07	0.68541	0
CDC25C	1.67077	1.40107e-07	0.685354	0
RNASEN	4.4063	1.4089e-07	0.685112	0
FNDC3A	-3.87036	1.41202e-07	0	0.685016
MET	1.29598	1.41469e-07	0.684934	0
LNX2	-3.46678	1.41725e-07	0	0.684855
ACAP2	4.34326	1.42024e-07	0.684764	0
BIN3	-4.16614	1.43655e-07	0	0.684268
CYP4B1	-0.891421	1.47472e-07	0	0.683129
CCDC150	1.72686	1.47529e-07	0.683112	0
PCMT1	5.14936	1.48312e-07	0.682883	0
KLF15	-1.39157	1.51784e-07	0	0.681877
HGSNAT	-3.19434	1.53206e-07	0	0.681473
KDELC2	3.16427	1.53605e-07	0.681359	0
IFIT2	2.22004	1.54798e-07	0.681023	0
GNA12	3.90948	1.56266e-07	0.680614	0
KLK11	-0.71376	1.59552e-07	0	0.67971
PART1	-0.934776	1.59878e-07	0	0.679621
FXYD4	-0.816497	1.61396e-07	0	0.679211
INTS10	-4.29703	1.62499e-07	0	0.678915
UQCRQ	-3.0733	1.66499e-07	0	0.677859
C17orf48	-4.22922	1.66634e-07	0	0.677824
MALL	-1.75769	1.67574e-07	0	0.677579
ZFP36	-2.08708	1.67732e-07	0	0.677538
GDF15	-1.35165	1.68756e-07	0	0.677274
HMGA2	0.711353	1.70147e-07	0.676918	0
DMC1	1.75999	1.71215e-07	0.676646	0
C1orf168	-1.01036	1.7134e-07	0	0.676614
IDUA	-2.17584	1.7184e-07	0	0.676487
TCP1	4.56644	1.73215e-07	0.676141	0
SFTA2	-1.47852	1.73361e-07	0	0.676105
LIMD1	-3.16948	1.75663e-07	0	0.675532
RPRD1B	4.90766	1.78271e-07	0.674892	0
CPSF4	4.11137	1.78654e-07	0.674799	0
SYNJ2	2.88312	1.7898e-07	0.67472	0
BEND6	1.59786	1.79185e-07	0.67467	0
CCDC88A	2.7405	1.79916e-07	0.674493	0
TDP1	2.8364	1.81765e-07	0.674049	0
CD274	1.51781	1.82432e-07	0.67389	0
DST	1.8533	1.82545e-07	0.673863	0
KIF20A	1.94125	1.83025e-07	0.673749	0
C1orf216	4.97573	1.86009e-07	0.673047	0
MBL1P	-1.49547	1.87218e-07	0	0.672765
PRPF4	5.54661	1.8753e-07	0.672693	0
MLF1	2.27983	1.8934e-07	0.672276	0
BACH1	3.9041	1.93283e-07	0.671381	0
SLC26A5	-1.42266	1.94231e-07	0	0.671168
XPC	-4.39606	1.95391e-07	0	0.67091
IRS2	-1.65906	1.97125e-07	0	0.670526
FARSB	4.84	1.98199e-07	0.67029	0
MYBL1	2.11023	1.98926e-07	0.670131	0
RNF26	4.88769	1.9977e-07	0.669947	0
RNF168	2.86229	2.00561e-07	0.669775	0
ENTPD3	-1.65769	2.03458e-07	0	0.669153
ALG10	3.53722	2.03869e-07	0.669065	0
PARP12	3.52678	2.04408e-07	0.66895	0
MRPS27	-4.33214	2.04823e-07	0	0.668862
MAOA	-1.67638	2.05262e-07	0	0.668769
RAD51C	5.20615	2.07669e-07	0.668263	0
NCRNA00188	-2.53131	2.09597e-07	0	0.667861
ANKHD1-EIF4EBP3	-3.08771	2.10923e-07	0	0.667588
EED	4.68202	2.13263e-07	0.667108	0
NCRNA00086	-1.3757	2.15926e-07	0	0.666569
HSD17B13	-1.17129	2.1883e-07	0	0.665989
STAT6	-4.74628	2.20018e-07	0	0.665754
NSUN2	4.27787	2.2526e-07	0.664732	0
SLC5A2	-1.38796	2.2562e-07	0	0.664662
BMP6	-1.2051	2.25742e-07	0	0.664639
SRPK2	4.8515	2.28045e-07	0.664198	0
PLA2G4A	-1.24865	2.28351e-07	0	0.66414
MOSC2	-2.44084	2.32775e-07	0	0.663306
SLC37A3	4.85538	2.35998e-07	0.662709	0
KIAA1949	2.7871	2.36405e-07	0.662634	0
PPIB	-3.13029	2.37338e-07	0	0.662463
NUBP1	-5.21744	2.40495e-07	0	0.661889
PLXNA1	2.9972	2.42172e-07	0.661588	0
YWHAG	4.31134	2.42724e-07	0.661489	0
PDIA3	-3.18098	2.47178e-07	0	0.660699
KLF2	-2.26918	2.49754e-07	0	0.660249
TTC38	-4.00288	2.52639e-07	0	0.65975
C10orf57	-3.67161	2.54314e-07	0	0.659463
GBP6	1.02088	2.61145e-07	0.658312	0
ZNF93	2.20287	2.6316e-07	0.657978	0
PLAU	1.39075	2.65485e-07	0.657596	0
PEBP1	-4.04818	2.66998e-07	0	0.657349
MCM3	3.71758	2.71261e-07	0.656661	0
SSR4	-2.68397	2.71945e-07	0	0.656552
ACADS	-2.96647	2.72185e-07	0	0.656514
AKAP5	2.27313	2.77338e-07	0.655699	0
CCL28	1.32767	2.78772e-07	0.655475	0
FAM167A	-1.30915	2.7965e-07	0	0.655338
CD109	1.44995	2.80955e-07	0.655136	0
CEBPD	-2.10669	2.82186e-07	0	0.654946
CUL2	5.22935	2.82603e-07	0.654882	0
MRPS22	4.62253	2.82857e-07	0.654843	0
RETSAT	-4.03671	2.85759e-07	0	0.6544
HDHD2	-4.70226	2.87443e-07	0	0.654145
SH2D4A	-2.64054	2.96308e-07	0	0.652826
MDFIC	2.49383	2.96998e-07	0.652725	0
UBE3C	5.11806	3.00835e-07	0.652167	0
SLC16A4	-1.21458	3.01552e-07	0	0.652064
CHCHD3	4.59766	3.02364e-07	0.651947	0
BPIL1	-0.591363	3.03533e-07	0	0.651779
EPB49	-2.38287	3.03554e-07	0	0.651776
FOXA3	-1.00197	3.06862e-07	0	0.651306
ARPC1A	4.34173	3.07159e-07	0.651264	0
POLR3H	-3.70607	3.1085e-07	0	0.650745
MTMR10	-4.12541	3.11025e-07	0	0.65072
LMAN2	-3.85511	3.12438e-07	0	0.650524
TRIM25	3.6253	3.12985e-07	0.650448	0
SORBS2	-1.28359	3.19017e-07	0	0.649619
EIF3F	-5.0815	3.21374e-07	0	0.649299
GRHL1	1.62067	3.21435e-07	0.649291	0
AURKA	1.86299	3.24923e-07	0.648822	0
C2CD4D	-1.6657	3.28071e-07	0	0.648403
MICB	2.08825	3.31775e-07	0.647916	0
ZNF551	2.84719	3.32372e-07	0.647837	0
CLSTN1	3.72879	3.33831e-07	0.647647	0
ZNF710	-2.24629	3.36069e-07	0	0.647357
ADI1	-3.39068	3.38711e-07	0	0.647017
GPR84	1.59336	3.43783e-07	0.646372	0
EPAS1	-2.82344	3.45577e-07	0	0.646145
AVPI1	-1.95447	3.46572e-07	0	0.646021
XK	-1.24966	3.50632e-07	0	0.645515
ACTL6A	3.87645	3.52004e-07	0.645345	0
HAUS6	3.55485	3.53855e-07	0.645118	0
ARNTL2	1.39949	3.55146e-07	0.644959	0
RFC5	3.29254	3.55214e-07	0.644951	0
ABP1	-0.744655	3.56228e-07	0	0.644827
C1orf96	3.74783	3.5798e-07	0.644614	0
MTHFD1	4.14436	3.62046e-07	0.644124	0
DNAJC9	4.11435	3.62509e-07	0.644068	0
GANC	-3.1524	3.62602e-07	0	0.644057
C1GALT1	2.59449	3.65034e-07	0.643767	0
RAB39	1.81615	3.66538e-07	0.643588	0
MFN2	5.52285	3.67138e-07	0.643517	0
CHMP7	-4.76439	3.76415e-07	0	0.642433
TBP	5.15502	3.82127e-07	0.641779	0
LENG9	-3.06126	3.82702e-07	0	0.641714
MDC1	3.63783	3.88485e-07	0.641063	0
VSIG2	-0.982485	3.8977e-07	0	0.640919
CTNNA1	-4.62386	3.91144e-07	0	0.640766
PLA2G4F	-1.31638	3.94149e-07	0	0.640434
C3orf34	2.98689	3.9609e-07	0.640221	0
PRRG2	-3.15294	3.9612e-07	0	0.640217
PGM2	2.85954	3.96881e-07	0.640134	0
NUP43	5.16642	3.98211e-07	0.639989	0
ACY1	-2.84647	4.02712e-07	0	0.639501
RPF2	4.0493	4.02957e-07	0.639474	0
SEC22A	5.00233	4.05504e-07	0.639201	0
HAUS5	3.34695	4.06958e-07	0.639045	0
OSGIN2	3.38544	4.09147e-07	0.638812	0
CREB3L4	-2.45805	4.10013e-07	0	0.63872
THOC4	3.27978	4.1031e-07	0.638689	0
ZNF33B	-3.4175	4.10662e-07	0	0.638652
FOLR1	-1.06343	4.15274e-07	0	0.638167
ITPKB	-2.85913	4.16506e-07	0	0.638038
CA6	-1.77175	4.16766e-07	0	0.638011
RRM2B	-3.23863	4.16964e-07	0	0.63799
UBXN8	-3.1259	4.17451e-07	0	0.637939
C1orf174	5.56236	4.18756e-07	0.637804	0
MAST4	-2.19627	4.18782e-07	0	0.637801
GOLPH3L	-3.63409	4.18946e-07	0	0.637784
SYBU	-1.3949	4.21752e-07	0	0.637494
MGC16275	-3.02726	4.25276e-07	0	0.637133
BAZ1B	4.4041	4.28491e-07	0.636806	0
IGBP1	-4.60086	4.2912e-07	0	0.636742
CDC27	5.00502	4.34272e-07	0.636224	0
GART	4.49285	4.35136e-07	0.636137	0
DPM1	4.42529	4.37089e-07	0.635943	0
NUDT9	-4.91655	4.42285e-07	0	0.63543
SUV39H1	3.70321	4.434e-07	0.63532	0
ESCO2	1.80906	4.44239e-07	0.635238	0
DHX35	4.62902	4.45453e-07	0.63512	0
P4HTM	-3.58974	4.46391e-07	0	0.635028
KPNA4	4.20101	4.48334e-07	0.63484	0
ATP1B3	3.2657	4.57785e-07	0.633934	0
TMEM194B	3.42111	4.57816e-07	0.633931	0
ATP6V1B1	-0.992729	4.59411e-07	0	0.63378
RFWD3	4.23343	4.6073e-07	0.633655	0
GPR158	0.831272	4.61818e-07	0.633553	0
SP8	0.922884	4.66059e-07	0.633156	0
PRPF38A	5.96248	4.68899e-07	0.632892	0
CATSPERB	-0.999836	4.69789e-07	0	0.63281
FBXO38	-4.60411	4.69999e-07	0	0.63279
PCDH1	-2.89249	4.71937e-07	0	0.632612
LOC100126784	1.41436	4.79994e-07	0.631876	0
DUSP9	0.952763	4.84633e-07	0.631459	0
KNDC1	-1.02504	4.87956e-07	0	0.631162
C1QL4	2.08946	4.88375e-07	0.631125	0
FAM108C1	-2.17851	4.89151e-07	0	0.631056
HEXDC	-2.45144	4.92514e-07	0	0.630758
C12orf48	2.05169	4.94901e-07	0.630548	0
HMGN2	4.76124	4.95395e-07	0.630505	0
FLJ42289	-1.98686	4.98414e-07	0	0.630241
TWISTNB	3.95851	4.99743e-07	0.630125	0
MT1L	1.45808	5.02011e-07	0.629929	0
YKT6	4.39624	5.02236e-07	0.629909	0
SNX22	-3.07572	5.03037e-07	0	0.62984
GTF2E1	4.55666	5.06498e-07	0.629542	0
GALNTL6	-1.2539	5.13347e-07	0	0.628959
RCOR3	-4.18524	5.17839e-07	0	0.62858
DCUN1D1	3.62149	5.27164e-07	0.627805	0
PLSCR1	2.80721	5.28574e-07	0.627689	0
TTL	3.97897	5.28786e-07	0.627672	0
CRELD2	-2.9057	5.32732e-07	0	0.627349
C1QL1	1.44184	5.3345e-07	0.627291	0
ATL3	3.33458	5.33776e-07	0.627264	0
TMEM229A	-0.860398	5.34407e-07	0	0.627213
IGF2BP2	1.31917	5.34472e-07	0.627208	0
GPR108	-4.69791	5.38165e-07	0	0.626908
MECOM	-1.71765	5.40685e-07	0	0.626706
SCNN1A	-1.95965	5.41318e-07	0	0.626655
DDX20	5.39519	5.42455e-07	0.626564	0
FKBP2	-2.85587	5.4277e-07	0	0.626538
RPL34	-3.09352	5.45397e-07	0	0.626329
MAPRE1	5.62391	5.5024e-07	0.625945	0
SEPW1	-2.66678	5.53689e-07	0	0.625673
VAX2	-1.45964	5.60876e-07	0	0.625113
FANCM	3.47578	5.62157e-07	0.625014	0
PLAC1	1.28036	5.62364e-07	0.624998	0
DUOXA1	-1.25655	5.65314e-07	0	0.624771
MYO5A	2.88429	5.65646e-07	0.624746	0
FCGR3A	1.71231	5.70216e-07	0.624396	0
C5orf32	-2.91618	5.73568e-07	0	0.624141
LOC440356	1.28183	5.73704e-07	0.624131	0
FAM100A	-3.70867	5.75551e-07	0	0.623992
LIMK1	2.95545	5.78047e-07	0.623804	0
C2orf79	-2.88635	5.78617e-07	0	0.623761
C10orf95	-1.69357	5.83505e-07	0	0.623396
SR140	4.56076	5.84531e-07	0.623319	0
ZNF524	-3.28689	5.86784e-07	0	0.623152
MCCC2	-4.03875	5.89934e-07	0	0.62292
HAUS8	3.89983	5.90555e-07	0.622874	0
GPRIN1	1.90406	5.98338e-07	0.622305	0
DACT2	-0.705371	6.01625e-07	0	0.622067
TMEM209	4.18682	6.01912e-07	0.622047	0
EPHB2	1.55175	6.0457e-07	0.621855	0
RANBP1	3.69309	6.1783e-07	0.620913	0
TTC26	2.81874	6.18925e-07	0.620836	0
RAP2B	3.1858	6.24543e-07	0.620444	0
MFSD2A	-1.83051	6.30419e-07	0	0.620037
CD302	-2.351	6.41107e-07	0	0.619307
ZSWIM7	-3.48961	6.45025e-07	0	0.619042
NOL11	5.1257	6.5666e-07	0.618266	0
GTPBP10	4.56043	6.61087e-07	0.617974	0
SNED1	-2.133	6.66839e-07	0	0.617598
CREB3L1	-1.31836	6.6697e-07	0	0.617589
KREMEN2	1.33021	6.75294e-07	0.617051	0
KLC3	1.27951	6.84621e-07	0.616455	0
WDR67	2.67622	6.84622e-07	0.616455	0
STIM2	-3.78459	6.90695e-07	0	0.616071
ZNF444	-3.35539	6.99195e-07	0	0.61554
GBP5	1.42508	7.01036e-07	0.615426	0
MTNR1A	-1.47463	7.05047e-07	0	0.615178
NEIL3	1.21546	7.06875e-07	0.615066	0
SUOX	-4.04762	7.07856e-07	0	0.615005
KCNU1	-1.29411	7.0948e-07	0	0.614906
AKAP1	-3.56053	7.23348e-07	0	0.614065
C1orf52	4.57098	7.23767e-07	0.61404	0
NUDT13	-2.48293	7.28637e-07	0	0.613749
GLOD5	-1.66973	7.28935e-07	0	0.613731
RPAP2	4.54267	7.30557e-07	0.613635	0
FBXL17	-3.9195	7.32806e-07	0	0.613501
FBXL8	-2.15476	7.32861e-07	0	0.613498
EFTUD2	5.56658	7.35677e-07	0.613331	0
VTA1	4.36759	7.3925e-07	0.613121	0
ADRA2C	-1.25188	7.39478e-07	0	0.613108
FAM26F	1.45205	7.4077e-07	0.613032	0
BRAF	3.54249	7.43444e-07	0.612875	0
MYO19	3.32384	7.43772e-07	0.612856	0
LILRB2	1.80748	7.46823e-07	0.612678	0
ARSE	-0.908057	7.50186e-07	0	0.612483
SUMO3	4.08967	7.51966e-07	0.61238	0
LRRC58	3.72924	7.53122e-07	0.612313	0
LRIG1	-2.55315	7.53581e-07	0	0.612287
ZIC2	0.802605	7.61007e-07	0.611861	0
PHLDB2	1.77488	7.67682e-07	0.611482	0
C1orf103	3.2572	7.6819e-07	0.611453	0
RAB4A	-4.46623	7.6979e-07	0	0.611363
DCUN1D5	3.93889	7.73864e-07	0.611134	0
AVL9	3.13021	7.74072e-07	0.611122	0
SIGIRR	-3.36484	7.76474e-07	0	0.610987
EPHX1	-1.55335	7.79488e-07	0	0.610819
LOC100130933	-1.38918	7.84201e-07	0	0.610557
PITX2	-0.713255	7.85398e-07	0	0.610491
FXYD3	-1.24132	7.88693e-07	0	0.610309
MT1DP	2.0023	7.888e-07	0.610303	0
MGC87042	1.4739	7.92027e-07	0.610126	0
RIF1	3.1535	7.93017e-07	0.610072	0
PHTF2	3.21155	7.94052e-07	0.610015	0
PBXIP1	-2.71428	7.99201e-07	0	0.609734
EFCAB2	-2.19598	8.00299e-07	0	0.609675
TIGD7	2.82829	8.02068e-07	0.609579	0
PHF6	3.97546	8.04515e-07	0.609447	0
R3HCC1	-4.15094	8.23405e-07	0	0.608439
SETBP1	-1.73362	8.25029e-07	0	0.608353
HIST1H2AG	1.68746	8.28496e-07	0.608171	0
NPEPPS	4.43798	8.29002e-07	0.608144	0
PDAP1	5.06774	8.29714e-07	0.608107	0
C3orf26	3.1765	8.41522e-07	0.607493	0
GNB2L1	-3.28963	8.43511e-07	0	0.607391
ZNF280D	-4.73524	8.48242e-07	0	0.607148
NUCB2	-2.9065	8.54954e-07	0	0.606806
NUP62	5.25331	8.65231e-07	0.606287	0
PTPN1	4.15831	8.69473e-07	0.606074	0
CASP5	1.55606	8.81179e-07	0.605494	0
CENPM	2.00765	8.82269e-07	0.60544	0
C10orf71	-1.59184	8.86037e-07	0	0.605255
PER1	-1.84327	8.87888e-07	0	0.605164
DTWD2	-3.37054	8.89251e-07	0	0.605098
VMA21	4.63036	8.91131e-07	0.605006	0
CIRBP	-3.2366	9.0528e-07	0	0.604322
C15orf48	1.09034	9.06407e-07	0.604268	0
FANCA	2.36047	9.06787e-07	0.604249	0
AGR2	-1.2221	9.28292e-07	0	0.603232
IER3IP1	-3.48843	9.31464e-07	0	0.603083
SAMD9	1.84028	9.32441e-07	0.603038	0
NOXA1	-1.72242	9.46571e-07	0	0.602385
DBF4B	2.67702	9.78115e-07	0.600961	0
KIAA1024	2.05411	9.83346e-07	0.600729	0
DUSP16	-3.3436	1.0001e-06	0	0.599996
LGTN	-3.96739	1.00261e-06	0	0.599887
FRRS1	1.72147	1.004e-06	0.599827	0
FAIM2	-1.0895	1.01754e-06	0	0.599245
SMPDL3B	-1.79434	1.01895e-06	0	0.599185
C1orf163	4.0496	1.02707e-06	0.59884	0
ASCC3	3.80459	1.03152e-06	0.598652	0
MSLN	-0.610352	1.0325e-06	0	0.598611
ANAPC1	3.62427	1.03283e-06	0.598597	0
PPPDE2	-2.6818	1.04373e-06	0	0.598141
SLC7A6OS	4.74996	1.05807e-06	0.597549	0
IGFBP2	-1.05512	1.06096e-06	0	0.59743
C19orf21	-1.76528	1.07673e-06	0	0.59679
NFKBIL2	2.28745	1.07866e-06	0.596712	0
TIPIN	3.3661	1.08316e-06	0.596531	0
KHDC1	2.32046	1.08868e-06	0.59631	0
PCBD1	-3.46063	1.08935e-06	0	0.596283
CHEK2	2.44498	1.09692e-06	0.595983	0
KIAA1324	-0.893676	1.10365e-06	0	0.595717
MAST2	3.93103	1.10643e-06	0.595608	0
MRE11A	4.2175	1.10771e-06	0.595557	0
NCAPD2	2.72922	1.1087e-06	0.595519	0
ZNF134	2.89317	1.11079e-06	0.595437	0
IFI44L	1.26498	1.11102e-06	0.595428	0
CCDC64B	-1.88687	1.11659e-06	0	0.595211
CCDC149	-3.4311	1.12083e-06	0	0.595046
RND3	1.69818	1.13135e-06	0.59464	0
METTL2B	3.91381	1.15207e-06	0.593852	0
LOC399815	1.59874	1.15329e-06	0.593806	0
STK33	-1.48838	1.15748e-06	0	0.593649
ACADSB	-2.34391	1.17365e-06	0	0.593046
TCF7L1	-1.63465	1.17977e-06	0	0.59282
ZNF544	3.50611	1.18309e-06	0.592698	0
ITM2B	-3.26128	1.18808e-06	0	0.592516
RAB42	1.77569	1.19045e-06	0.592429	0
TFF1	-0.53571	1.20108e-06	0	0.592043
GABARAP	-4.3607	1.20381e-06	0	0.591944
LOC100302401	2.45406	1.20416e-06	0.591932	0
FLJ37201	2.41246	1.21072e-06	0.591696	0
ACER3	3.53742	1.21111e-06	0.591682	0
PANX1	3.81425	1.21829e-06	0.591425	0
MGST2	-3.62534	1.2192e-06	0	0.591393
MAML3	-2.56416	1.2326e-06	0	0.590918
PDIA3P	-3.01789	1.23529e-06	0	0.590823
CALCOCO1	-3.32469	1.23733e-06	0	0.590752
COQ4	-3.84748	1.24155e-06	0	0.590603
ISG20	-2.27551	1.24907e-06	0	0.590341
AQP5	-0.583294	1.24993e-06	0	0.590312
XBP1	-2.53743	1.25688e-06	0	0.590071
SSR2	-3.57663	1.25849e-06	0	0.590015
LPPR1	-0.905454	1.27911e-06	0	0.589309
CALCA	-0.477024	1.28615e-06	0	0.589071
CEP78	3.72622	1.29935e-06	0.588627	0
C16orf59	2.01421	1.30267e-06	0.588517	0
MND1	1.81767	1.30347e-06	0.58849	0
MBOAT2	1.98135	1.30533e-06	0.588428	0
E2F3	3.49601	1.3054e-06	0.588426	0
ADRA2A	-1.10353	1.31186e-06	0	0.588211
LLGL1	3.41238	1.32149e-06	0.587894	0
ATP8A1	-1.6632	1.33004e-06	0	0.587613
SERPINF2	-1.30619	1.34069e-06	0	0.587267
NPAT	3.81195	1.34239e-06	0.587212	0
ENO1	3.39326	1.34294e-06	0.587194	0
FAM149A	-1.46308	1.34869e-06	0	0.587009
DGAT1	-2.71837	1.35001e-06	0	0.586966
C7orf41	-1.90294	1.35897e-06	0	0.586679
MGC2889	2.02517	1.35998e-06	0.586647	0
NRXN3	-1.29398	1.36596e-06	0	0.586456
CLEC3B	-1.53194	1.38615e-06	0	0.585819
ACAA1	-3.54047	1.39166e-06	0	0.585647
MOB2	-4.43215	1.39217e-06	0	0.585631
ZNF829	1.97747	1.39994e-06	0.585389	0
LANCL3	-1.18978	1.40002e-06	0	0.585387
NUDT1	2.92186	1.42179e-06	0.584717	0
SLC22A5	-3.70339	1.42491e-06	0	0.584621
DNTTIP2	4.31381	1.42569e-06	0.584597	0
ATF7	-4.83733	1.43496e-06	0	0.584316
KRIT1	5.05631	1.43532e-06	0.584305	0
WNT4	-1.12606	1.45116e-06	0	0.583828
ZNF330	-3.73216	1.4539e-06	0	0.583747
MTL5	1.16706	1.45406e-06	0.583742	0
DOCK5	-1.83209	1.46246e-06	0	0.583492
MOSC1	-1.3675	1.46617e-06	0	0.583381
PRPF40A	5.58344	1.47934e-06	0.582993	0
GOLT1A	-1.51333	1.48018e-06	0	0.582968
WIF1	-0.667732	1.48176e-06	0	0.582922
MAST1	1.37914	1.488e-06	0.58274	0
NICN1	-3.12422	1.49594e-06	0	0.582508
C9orf140	1.74701	1.50214e-06	0.582329	0
HHAT	-2.30568	1.50614e-06	0	0.582213
B3GNT5	2.17612	1.51475e-06	0.581966	0
CCDC125	-3.50014	1.52264e-06	0	0.58174
CAD	3.19939	1.52715e-06	0.581612	0
LTA4H	-3.06641	1.53536e-06	0	0.581379
IRX5	-1.12989	1.54137e-06	0	0.581209
DALRD3	-4.17647	1.55178e-06	0	0.580917
KLRC3	1.33568	1.56555e-06	0.580533	0
CXCL9	1.06	1.57217e-06	0.58035	0
FAM8A1	-3.56882	1.57626e-06	0	0.580237
CRY2	-2.9592	1.58068e-06	0	0.580116
LEPROTL1	-4.17775	1.59493e-06	0	0.579726
MUC1	-1.7043	1.59864e-06	0	0.579625
OVGP1	-1.59875	1.60181e-06	0	0.579539
SPRYD3	-4.70304	1.60752e-06	0	0.579384
ZNF813	2.38355	1.61668e-06	0.579138	0
CAMKK1	-2.39169	1.61698e-06	0	0.579129
GLB1	-4.03563	1.62748e-06	0	0.578848
ZNF558	3.31931	1.62838e-06	0.578824	0
CCDC86	4.05923	1.62878e-06	0.578814	0
FN3K	-2.40177	1.63976e-06	0	0.578522
CAMK2N2	1.40061	1.64234e-06	0.578454	0
XPO5	3.72907	1.65915e-06	0.578011	0
ARHGEF2	-3.11065	1.66261e-06	0	0.577921
SIRT3	-4.54508	1.66711e-06	0	0.577804
C11orf84	3.14546	1.67497e-06	0.577599	0
RILP	-2.62994	1.68057e-06	0	0.577454
SH2D5	1.36209	1.68899e-06	0.577237	0
ZNF492	1.22186	1.69782e-06	0.577011	0
FOXE1	0.724886	1.70848e-06	0.576739	0
CRLF1	-0.596825	1.70971e-06	0	0.576708
ECT2	2.12008	1.7285e-06	0.576233	0
DUSP1	-1.61681	1.74216e-06	0	0.575891
CEP97	2.65414	1.7648e-06	0.57533	0
HOPX	-1.11097	1.80469e-06	0	0.57436
TMX4	-2.89681	1.80887e-06	0	0.574259
CNGA3	-0.68009	1.81125e-06	0	0.574202
RGS5	-2.02366	1.81587e-06	0	0.574092
ZBTB4	-3.58726	1.83671e-06	0	0.573596
TAF6	4.32581	1.84204e-06	0.57347	0
SPACA4	-1.60974	1.84765e-06	0	0.573338
CMTM1	2.65734	1.85197e-06	0.573237	0
CCL7	1.09387	1.85253e-06	0.573224	0
ICMT	4.74418	1.86146e-06	0.573015	0
ZNF667	1.2324	1.86387e-06	0.572958	0
HABP2	-0.753395	1.87071e-06	0	0.572799
RPL36AL	-3.60876	1.89749e-06	0	0.572182
MSMB	-0.500523	1.93896e-06	0	0.571243
ARL13B	3.50356	1.93926e-06	0.571236	0
FGL1	-0.512189	1.94739e-06	0	0.571055
SAMD9L	1.73836	1.95015e-06	0.570993	0
C9orf109	1.75469	1.95201e-06	0.570952	0
ZNF833	2.6633	1.95404e-06	0.570907	0
TRIM68	-2.32686	1.95652e-06	0	0.570852
GFM1	4.33231	1.9575e-06	0.57083	0
CCNG1	-2.87113	1.95758e-06	0	0.570828
SIRT4	-2.63409	1.9757e-06	0	0.570428
CA8	-0.892166	1.98189e-06	0	0.570292
POLE3	4.23543	1.99626e-06	0.569978	0
SNIP1	5.55796	2.00925e-06	0.569697	0
ITCH	4.54059	2.02363e-06	0.569387	0
SLC35A3	2.77969	2.02552e-06	0.569346	0
COX4I2	-1.62551	2.05781e-06	0	0.568659
NAA15	4.25504	2.06138e-06	0.568584	0
IL4I1	1.50379	2.08401e-06	0.56811	0
OBP2A	-1.11685	2.10629e-06	0	0.567648
TRIO	2.5428	2.11287e-06	0.567513	0
ODZ1	-0.773062	2.11692e-06	0	0.567429
COMMD2	3.91814	2.11813e-06	0.567405	0
FAM82A1	-1.97063	2.12587e-06	0	0.567246
TBC1D23	4.65448	2.13834e-06	0.566992	0
C15orf59	-1.32113	2.15088e-06	0	0.566738
THG1L	-3.1349	2.15449e-06	0	0.566666
TMEM185B	4.35505	2.15664e-06	0.566622	0
FLJ44606	-2.30677	2.16098e-06	0	0.566535
TMEM59L	-0.65	2.21405e-06	0	0.565481
MRPL47	3.62459	2.22283e-06	0.565309	0
PRPS1	4.09917	2.24547e-06	0.564869	0
SLC35A4	-4.85009	2.25495e-06	0	0.564686
FCGR1B	1.69753	2.25591e-06	0.564668	0
CXorf56	4.02972	2.26119e-06	0.564566	0
TMEFF1	2.1013	2.26392e-06	0.564514	0
CEP152	2.5441	2.29521e-06	0.563918	0
RAD18	3.64889	2.30092e-06	0.56381	0
ORC5L	3.85604	2.30215e-06	0.563787	0
ABCC6	-1.57887	2.30218e-06	0	0.563786
PARK2	-1.61542	2.30382e-06	0	0.563755
RRM1	3.57748	2.30472e-06	0.563738	0
SFTA1P	-0.945841	2.33682e-06	0	0.563137
ZNF92	3.20841	2.34916e-06	0.562909	0
ATP1B2	-1.64846	2.35046e-06	0	0.562885
SLC22A23	-1.66078	2.36272e-06	0	0.562659
ATP9B	-3.4135	2.36923e-06	0	0.562539
IL12RB2	1.28178	2.40517e-06	0.561885	0
SNX6	3.29294	2.40576e-06	0.561875	0
DPH3B	3.00884	2.41611e-06	0.561688	0
NOM1	4.39501	2.41667e-06	0.561678	0
IFIH1	2.27735	2.4254e-06	0.561522	0
KIAA1731	3.42506	2.42558e-06	0.561518	0
CDK6	1.7982	2.44464e-06	0.561179	0
HIST1H2BJ	1.31334	2.44998e-06	0.561084	0
GOPC	5.17952	2.45555e-06	0.560985	0
C4orf21	2.40724	2.47725e-06	0.560603	0
KIF12	-0.96454	2.49346e-06	0	0.56032
NUP85	4.3213	2.49748e-06	0.56025	0
C17orf28	-2.35631	2.50854e-06	0	0.560058
FMO5	-1.11824	2.5102e-06	0	0.560029
C5orf53	-2.69581	2.51854e-06	0	0.559885
LRPAP1	-3.50774	2.51859e-06	0	0.559884
LOC220930	2.50948	2.52539e-06	0.559767	0
MBD4	4.9874	2.53125e-06	0.559666	0
TRAPPC1	-3.92577	2.53222e-06	0	0.55965
SLC25A24	3.07117	2.53268e-06	0.559642	0
GAS5	-1.96712	2.54308e-06	0	0.559464
DMRTC1B	-1.07541	2.54968e-06	0	0.559351
CENPH	2.44502	2.58267e-06	0.558793	0
PIF1	1.55298	2.60529e-06	0.558414	0
MYRIP	-1.10271	2.62195e-06	0	0.558138
DCTN6	-3.73722	2.6295e-06	0	0.558013
CCDC138	2.46281	2.64479e-06	0.557761	0
CLDN7	-2.82827	2.66158e-06	0	0.557486
YPEL5	-4.08615	2.66742e-06	0	0.557391
HDAC9	1.37099	2.67359e-06	0.557291	0
PCOTH	-1.65193	2.67955e-06	0	0.557194
DLX2	3.00813	2.69143e-06	0.557002	0
DNA2	2.12408	2.69979e-06	0.556867	0
ATR	3.89714	2.70617e-06	0.556764	0
PTPN12	4.30229	2.71879e-06	0.556562	0
OXCT1	1.69421	2.71934e-06	0.556554	0
MPST	-2.63089	2.71941e-06	0	0.556553
FLJ90757	-2.0933	2.74141e-06	0	0.556203
ARF1	-4.53363	2.75547e-06	0	0.55598
AK3L1	1.08627	2.7794e-06	0.555605	0
PSEN2	-4.00101	2.78309e-06	0	0.555547
MRPL37	4.90468	2.7932e-06	0.55539	0
RASAL2	2.80865	2.81013e-06	0.555127	0
ZNF575	-3.57278	2.81487e-06	0	0.555054
TMEM111	-3.92046	2.85215e-06	0	0.554483
CDHR3	-0.714431	2.85359e-06	0	0.554461
GPR39	-2.03172	2.8847e-06	0	0.55399
RHBDF2	2.63412	2.88538e-06	0.55398	0
HGD	-0.651759	2.90684e-06	0	0.553658
C4orf46	3.05423	2.91482e-06	0.553539	0
CCDC75	2.5257	2.91635e-06	0.553516	0
ST6GALNAC1	-1.05691	2.92959e-06	0	0.553319
IFITM2	-2.44688	2.92998e-06	0	0.553314
EBPL	-2.59082	2.93044e-06	0	0.553307
RPS14	-2.54395	2.94782e-06	0	0.55305
CPEB2	-2.91889	2.95291e-06	0	0.552975
TMEM9	-2.72446	2.97175e-06	0	0.552699
AMBP	-0.66551	2.97443e-06	0	0.55266
MPG	-2.98635	2.98264e-06	0	0.55254
NAPSA	-0.96182	2.99789e-06	0	0.552318
HMGA1	2.07153	3.01478e-06	0.552074	0
RPLP1	-2.9861	3.01508e-06	0	0.55207
HIGD1B	-1.6625	3.01834e-06	0	0.552023
RPL15	-3.33309	3.02357e-06	0	0.551948
CLDN2	-0.634721	3.03107e-06	0	0.55184
TTC15	-4.6211	3.03183e-06	0	0.55183
C18orf32	-3.25959	3.03888e-06	0	0.551729
JMJD8	-3.37392	3.06685e-06	0	0.551331
FAM135A	2.62331	3.06739e-06	0.551323	0
EHHADH	2.47787	3.07704e-06	0.551187	0
ZNF670	2.70855	3.07853e-06	0.551166	0
TTYH3	2.60592	3.08695e-06	0.551047	0
MDM4	-2.87419	3.09044e-06	0	0.550998
DUOXA2	-1.28272	3.09648e-06	0	0.550913
UBXN7	2.48603	3.10078e-06	0.550853	0
MARVELD2	-3.15182	3.13857e-06	0	0.550327
KCNJ14	2.1351	3.13996e-06	0.550308	0
HIGD2A	-3.28583	3.14725e-06	0	0.550207
SLC25A6	-3.03647	3.14784e-06	0	0.550199
PMS2L1	3.75174	3.15345e-06	0.550121	0
CYB561	-3.36775	3.15521e-06	0	0.550097
HAR1A	-1.28568	3.15562e-06	0	0.550092
CRB3	-2.68874	3.1577e-06	0	0.550063
PTPRE	-2.25205	3.17628e-06	0	0.549808
STRN	2.49728	3.19365e-06	0.549571	0
C20orf20	3.48659	3.20106e-06	0.549471	0
RCC2	3.78934	3.20568e-06	0.549408	0
FAM177A1	-2.36942	3.20969e-06	0	0.549354
ORM2	-0.71704	3.21567e-06	0	0.549273
LY6G5C	-2.72345	3.226e-06	0	0.549134
ADCY3	2.74657	3.24135e-06	0.548927	0
BRD8	-4.27531	3.29377e-06	0	0.548231
FSTL4	-0.740608	3.29738e-06	0	0.548183
FANCL	3.30372	3.30159e-06	0.548128	0
POP1	3.35183	3.30721e-06	0.548054	0
C3orf37	4.44546	3.32093e-06	0.547874	0
C14orf72	-1.79435	3.33543e-06	0	0.547685
CNTN3	-1.03269	3.34537e-06	0	0.547556
FSCN1	1.55022	3.34708e-06	0.547533	0
NAA40	3.52686	3.36281e-06	0.54733	0
DCTD	-4.85726	3.36543e-06	0	0.547296
NSA2	-3.29432	3.41174e-06	0	0.546702
LY6K	0.631221	3.41283e-06	0.546689	0
DLC1	-1.52412	3.46315e-06	0	0.546053
CLN3	-3.54063	3.4902e-06	0	0.545715
RPL10A	-3.07069	3.50577e-06	0	0.545522
PICALM	4.89692	3.50937e-06	0.545477	0
UBE2E3	3.46837	3.51882e-06	0.54536	0
GPR115	0.79525	3.53225e-06	0.545195	0
DUOX1	-1.04956	3.53344e-06	0	0.54518
C14orf184	-1.20035	3.54492e-06	0	0.545039
CCDC90B	2.68925	3.56744e-06	0.544764	0
HACE1	3.04851	3.69271e-06	0.543266	0
EXOSC10	5.59277	3.69675e-06	0.543218	0
HS2ST1	3.35401	3.70567e-06	0.543113	0
SYCE2	1.82843	3.73003e-06	0.542829	0
NT5C	-3.02507	3.73543e-06	0	0.542766
TNFRSF10B	-2.93827	3.7388e-06	0	0.542727
LRRC8D	4.14426	3.7726e-06	0.542336	0
FANCE	3.07083	3.78195e-06	0.542228	0
CST6	0.903659	3.80477e-06	0.541967	0
B3GALNT1	1.72776	3.80993e-06	0.541908	0
HMGCS1	2.50389	3.82663e-06	0.541718	0
TMEM201	3.55796	3.84866e-06	0.541469	0
G6PC3	-3.82165	3.85701e-06	0	0.541375
FXR1	4.2479	3.92387e-06	0.540629	0
DSE	2.23183	3.93806e-06	0.540472	0
OBSL1	-1.55391	3.96505e-06	0	0.540175
CHST10	-1.85504	3.96703e-06	0	0.540153
RPL14	-2.89824	3.9792e-06	0	0.54002
PDK1	2.32223	3.98167e-06	0.539993	0
XRN1	3.68586	3.991e-06	0.539892	0
NNMT	-1.47753	3.9979e-06	0	0.539817
GPN1	3.93566	4.01887e-06	0.53959	0
FRMD5	1.14338	4.03479e-06	0.539418	0
CDK7	-3.58656	4.03915e-06	0	0.539371
GMNN	2.52459	4.04216e-06	0.539339	0
TIMELESS	2.45164	4.05173e-06	0.539236	0
GK	-1.81212	4.09808e-06	0	0.538742
HNRNPA0	-4.77913	4.10319e-06	0	0.538688
C1orf64	-1.25459	4.13952e-06	0	0.538305
RELL1	2.43236	4.14876e-06	0.538208	0
ZUFSP	4.53709	4.15681e-06	0.538124	0
PRDM16	-0.949441	4.17521e-06	0	0.537932
HOXA1	1.17349	4.17802e-06	0.537903	0
INTS9	-3.98668	4.18167e-06	0	0.537865
PSMB2	4.98323	4.24096e-06	0.537254	0
CLEC4F	-1.30462	4.25558e-06	0	0.537104
CDK5R1	1.92531	4.29294e-06	0.536725	0
PGM2L1	2.23311	4.31546e-06	0.536497	0
PRR15L	-1.52166	4.3188e-06	0	0.536464
CARKD	-3.13132	4.32566e-06	0	0.536395
FAM168A	2.24818	4.34298e-06	0.536221	0
HPS5	4.11846	4.34622e-06	0.536189	0
CLIC6	-0.99573	4.35963e-06	0	0.536055
BLOC1S1	-3.20456	4.36125e-06	0	0.536039
WDR75	4.82289	4.38189e-06	0.535834	0
KATNA1	4.62219	4.38689e-06	0.535784	0
RAB23	2.80139	4.4184e-06	0.535473	0
PBLD	-1.52594	4.42182e-06	0	0.53544
LYAR	3.4293	4.42937e-06	0.535366	0
BEND7	-1.39348	4.43708e-06	0	0.53529
MFSD2B	1.95302	4.44172e-06	0.535245	0
RNGTT	4.04541	4.4639e-06	0.535029	0
MAGEA6	0.514077	4.48424e-06	0.534831	0
FAM3D	-0.807576	4.49798e-06	0	0.534698
LOC285629	-0.982984	4.4996e-06	0	0.534683
LOC339674	1.82682	4.50349e-06	0.534645	0
KLK13	-0.702148	4.52531e-06	0	0.534435
AKR7A3	-0.711482	4.54866e-06	0	0.534212
C9orf110	1.64722	4.55662e-06	0.534136	0
UBXN10	-1.25759	4.56435e-06	0	0.534062
GNB4	2.15031	4.59698e-06	0.533753	0
FXR2	-4.23771	4.65883e-06	0	0.533172
ABCF2	4.64563	4.68083e-06	0.532968	0
GREB1	-1.12543	4.72563e-06	0	0.532554
SCUBE2	-1.00684	4.7428e-06	0	0.532397
PLBD1	1.51566	4.78739e-06	0.53199	0
CBLL1	4.73591	4.79776e-06	0.531896	0
C18orf19	3.55223	4.81583e-06	0.531733	0
DDX58	2.491	4.82692e-06	0.531633	0
SPINK5	-0.774932	4.82837e-06	0	0.53162
SATB1	-1.93366	4.83473e-06	0	0.531563
GPR156	1.28673	4.83875e-06	0.531527	0
PLOD2	1.33773	4.84763e-06	0.531447	0
NPDC1	-1.63652	5.0058e-06	0	0.530053
HERC5	1.64588	5.0149e-06	0.529974	0
PRIM2	2.58561	5.0191e-06	0.529937	0
ZC3HC1	4.2718	5.02539e-06	0.529883	0
RSAD2	1.52388	5.05433e-06	0.529634	0
INMT	-1.2059	5.07792e-06	0	0.529431
KIT	-0.992677	5.08452e-06	0	0.529375
HDDC3	-2.91873	5.12759e-06	0	0.529009
ABO	-1.13369	5.13779e-06	0	0.528922
CSRP1	-3.64473	5.13852e-06	0	0.528916
MSLNL	-0.929529	5.17882e-06	0	0.528577
GCNT3	-0.838727	5.19088e-06	0	0.528476
FAM161A	2.52637	5.20098e-06	0.528391	0
ZNF329	2.67124	5.22386e-06	0.528201	0
DCAF17	5.0324	5.22957e-06	0.528153	0
ABLIM2	-1.37736	5.2299e-06	0	0.528151
RNF167	-4.63808	5.2515e-06	0	0.527972
PPP1R13B	-2.24413	5.26262e-06	0	0.52788
KIAA0101	1.59397	5.27053e-06	0.527815	0
TAP1	1.83662	5.2733e-06	0.527792	0
EIF4G1	3.74959	5.27695e-06	0.527762	0
HINT1	-2.84611	5.28377e-06	0	0.527706
MCPH1	-3.97891	5.28781e-06	0	0.527672
MOAP1	-3.19138	5.31245e-06	0	0.52747
SKP1	-3.67167	5.33587e-06	0	0.527279
DCP1B	-3.72937	5.36352e-06	0	0.527055
KPNA1	4.50169	5.39379e-06	0.526811	0
NUDT12	-2.26057	5.39644e-06	0	0.526789
B9D1	-2.25084	5.42292e-06	0	0.526577
RASA2	2.46437	5.43418e-06	0.526487	0
PEX11B	-3.72467	5.444e-06	0	0.526408
ZC3HAV1	4.46292	5.52633e-06	0.525756	0
NBN	3.2169	5.53708e-06	0.525672	0
RNF222	1.80511	5.54741e-06	0.525591	0
ARHGAP29	2.21906	5.55265e-06	0.52555	0
ARSD	-2.33753	5.59747e-06	0	0.525201
CACNA1D	-1.18593	5.62237e-06	0	0.525008
RDX	3.3105	5.62492e-06	0.524988	0
PGAM1	3.54822	5.62647e-06	0.524976	0
ZFAND5	-3.37313	5.66473e-06	0	0.524682
NLRC5	1.89337	5.68285e-06	0.524543	0
YBX1	4.08807	5.68301e-06	0.524542	0
FAM133A	0.653094	5.69508e-06	0.52445	0
PEX3	3.5634	5.75099e-06	0.524026	0
NR4A2	-1.27195	5.77487e-06	0	0.523846
BET1L	-5.11216	5.78509e-06	0	0.523769
GHDC	-3.29769	5.79381e-06	0	0.523704
FOXK1	2.78136	5.8184e-06	0.52352	0
CCNB1	1.71251	5.81943e-06	0.523512	0
EPSTI1	1.59261	5.85593e-06	0.52324	0
ADCK4	-3.23158	5.90369e-06	0	0.522888
C9orf156	-4.39217	5.91195e-06	0	0.522827
BBC3	-2.62701	5.95901e-06	0	0.522483
NMD3	3.13269	5.98128e-06	0.522321	0
SLC7A6	3.41116	5.99213e-06	0.522242	0
AGXT2L1	-0.691363	6.01528e-06	0	0.522074
SECISBP2	-4.27361	6.02758e-06	0	0.521986
CCNDBP1	-3.65443	6.03433e-06	0	0.521937
INPP5K	-3.93877	6.07657e-06	0	0.521634
TDRD3	-3.97962	6.07838e-06	0	0.521621
DTX3L	3.33274	6.09572e-06	0.521497	0
H2AFX	2.58703	6.09978e-06	0.521469	0
GNRHR2	-2.85626	6.12984e-06	0	0.521255
NACA	-4.1461	6.14345e-06	0	0.521159
PRSS16	-2.86363	6.1483e-06	0	0.521125
DMBX1	0.893711	6.14834e-06	0.521124	0
CHL1	-0.918564	6.18394e-06	0	0.520873
KLHL31	1.42608	6.20639e-06	0.520716	0
LRCH3	2.85995	6.22458e-06	0.520589	0
CRELD1	-3.05493	6.27758e-06	0	0.520221
ARRDC3	-2.01595	6.29588e-06	0	0.520094
GPR180	3.17145	6.29975e-06	0.520068	0
C2orf44	4.39117	6.30176e-06	0.520054	0
SLC30A5	-4.53751	6.31616e-06	0	0.519955
SYNCRIP	5.24201	6.31845e-06	0.519939	0
STX1B	1.52696	6.33218e-06	0.519845	0
CSRNP1	-2.30292	6.33874e-06	0	0.5198
CCL4	1.53949	6.36421e-06	0.519626	0
MCEE	-2.8413	6.37977e-06	0	0.519519
GABRG3	-1.12251	6.39587e-06	0	0.51941
NCBP2	4.38936	6.39841e-06	0.519393	0
PNPLA8	3.86629	6.4193e-06	0.519251	0
FAM173A	-2.40635	6.48552e-06	0	0.518805
PARP2	3.38611	6.52584e-06	0.518536	0
DDX18	5.07598	6.583e-06	0.518158	0
GRM5	0.952234	6.60109e-06	0.518038	0
TREH	-1.42818	6.66919e-06	0	0.517593
ID1	-1.33689	6.6697e-06	0	0.517589
LOC723809	-0.843891	6.6984e-06	0	0.517403
KIF9	-2.45098	6.73656e-06	0	0.517156
CRYM	-0.785945	6.73782e-06	0	0.517148
ATP5A1	-3.88903	6.76639e-06	0	0.516964
OBFC1	-2.78987	6.77036e-06	0	0.516939
OTUD7A	-1.62919	6.77637e-06	0	0.5169
SLC25A19	3.06137	6.79917e-06	0.516754	0
GSTP1	-2.35882	6.85989e-06	0	0.516368
ASTE1	4.25633	6.91131e-06	0.516044	0
MANF	-2.86555	6.92367e-06	0	0.515966
TAP2	2.23246	6.92879e-06	0.515934	0
WDR70	4.28345	6.94821e-06	0.515813	0
ERLEC1	-3.71258	6.97642e-06	0	0.515637
CORO2B	-1.5917	7.01005e-06	0	0.515428
TAPT1	-2.71376	7.07143e-06	0	0.515049
CCDC21	3.08616	7.08948e-06	0.514939	0
ATAD3A	3.0465	7.14823e-06	0.51458	0
RBBP8	2.98836	7.15115e-06	0.514562	0
RAB7A	4.90777	7.19168e-06	0.514317	0
CCK	-1.18491	7.20013e-06	0	0.514266
PDCD1LG2	1.42877	7.21507e-06	0.514176	0
UBL3	-2.83743	7.21977e-06	0	0.514148
C17orf58	2.82026	7.27541e-06	0.513814	0
ZNF430	2.4095	7.2855e-06	0.513754	0
SPHK1	1.42185	7.29978e-06	0.513669	0
TOMM20	-3.39049	7.31527e-06	0	0.513577
IFIT3	1.77126	7.37143e-06	0.513245	0
DCAF8	-4.15725	7.38197e-06	0	0.513183
UBE2S	1.76367	7.41387e-06	0.512995	0
2017-09-07	4.71931	7.41778e-06	0.512973	0
FAM46A	-1.738	7.42813e-06	0	0.512912
CKS1B	2.11281	7.45497e-06	0.512755	0
MRPS30	3.36411	7.46566e-06	0.512693	0
RICH2	-1.52376	7.46656e-06	0	0.512688
MYO3B	0.878685	7.51514e-06	0.512406	0
SSRP1	4.1314	7.59695e-06	0.511936	0
KRTCAP3	-1.6729	7.61359e-06	0	0.511841
ZNF662	-1.34495	7.61964e-06	0	0.511807
SERBP1	4.94028	7.65497e-06	0.511606	0
POM121	3.88125	7.7745e-06	0.510933	0
FDXR	-2.3534	7.84963e-06	0	0.510515
ZNF347	2.25317	7.89696e-06	0.510254	0
EIF5A2	2.09102	8.00374e-06	0.509671	0
C10orf12	2.73295	8.042e-06	0.509464	0
RRP8	-4.61469	8.0975e-06	0	0.509165
KLHL7	3.29939	8.14269e-06	0.508923	0
GFRA1	-1.0291	8.16958e-06	0	0.50878
GTF3C3	4.33147	8.17941e-06	0.508728	0
FHIT	-1.99582	8.19322e-06	0	0.508655
SAMHD1	1.88315	8.20808e-06	0.508576	0
CACNB3	-2.05689	8.28212e-06	0	0.508186
PMS2L5	3.1718	8.28353e-06	0.508178	0
MAGEA3	0.504651	8.33079e-06	0.507931	0
PAQR3	2.4421	8.35873e-06	0.507786	0
GNPTG	-3.18607	8.38865e-06	0	0.507631
NCRNA00081	-3.3675	8.4018e-06	0	0.507563
RPL13	-2.6391	8.52033e-06	0	0.506954
ATAD3C	-1.36952	8.53698e-06	0	0.50687
C9orf103	-2.69801	8.58503e-06	0	0.506626
DKC1	3.67131	8.59798e-06	0.50656	0
RPL7A	-2.81626	8.77052e-06	0	0.505697
N6AMT2	-2.83494	8.7978e-06	0	0.505563
TUBB6	2.25327	8.82405e-06	0.505433	0
RAB25	-2.46206	8.82961e-06	0	0.505406
SLC2A5	1.23333	8.83868e-06	0.505361	0
ZDHHC24	-3.23692	8.89669e-06	0	0.505077
C15orf60	-2.5644	8.90605e-06	0	0.505031
SPHAR	-2.95184	8.93935e-06	0	0.504869
ENO3	-0.876406	8.94503e-06	0	0.504842
TMEM205	-3.02069	8.95879e-06	0	0.504775
ANKRA2	-3.73976	8.98598e-06	0	0.504643
SFTPD	-0.761562	9.06014e-06	0	0.504286
FYB	1.65751	9.09641e-06	0.504113	0
ACCS	-1.78758	9.10243e-06	0	0.504084
GATSL1	1.77277	9.20008e-06	0.503621	0
CAT	-2.63192	9.27706e-06	0	0.503259
C9orf9	-2.07471	9.29294e-06	0	0.503185
RELT	2.34627	9.29357e-06	0.503182	0
DSC2	1.62976	9.31273e-06	0.503092	0
TRRAP	2.9384	9.33775e-06	0.502976	0
COPS8	4.62982	9.34538e-06	0.50294	0
QDPR	-3.04693	9.38321e-06	0	0.502765
KDM3B	-4.2584	9.38687e-06	0	0.502748
SP4	2.52591	9.50288e-06	0.502214	0
C21orf63	-1.50013	9.53073e-06	0	0.502087
IRF2BP1	-3.11111	9.54923e-06	0	0.502003
HIST1H2AJ	2.3794	9.56794e-06	0.501918	0
LUZP1	3.08666	9.61953e-06	0.501685	0
CYTH2	-3.58085	9.73864e-06	0	0.50115
TMEM173	-2.23897	9.8357e-06	0	0.500719
HEYL	-2.17755	9.86836e-06	0	0.500575
TAF13	2.71819	9.87597e-06	0.500542	0
ELMO1	-1.95464	9.94048e-06	0	0.500259
MEX3D	2.57961	9.98009e-06	0.500087	0
CDH15	-0.930642	9.99764e-06	0	0.50001
C9orf84	0.936081	1.00879e-05	0.49962	0
AGGF1	-4.49723	1.00987e-05	0	0.499574
EIF4H	5.01999	1.0114e-05	0.499508	0
SULT1A2	-1.38564	1.01614e-05	0	0.499305
KAT5	-5.13742	1.01782e-05	0	0.499233
CTNNAL1	2.73455	1.02147e-05	0.499078	0
UPF3B	3.11776	1.0243e-05	0.498957	0
AGL	2.82449	1.02442e-05	0.498952	0
POLD3	4.05775	1.03269e-05	0.498603	0
CISH	-1.82539	1.03346e-05	0	0.498571
ZDHHC2	-2.2463	1.03892e-05	0	0.498342
EBNA1BP2	4.13572	1.04186e-05	0.498219	0
KCNE4	-1.02407	1.04392e-05	0	0.498133
CLDN5	-1.58392	1.04609e-05	0	0.498043
AXIN2	-1.62094	1.06048e-05	0	0.49745
PCSK2	-0.48213	1.0631e-05	0	0.497343
DECR2	-2.40546	1.06382e-05	0	0.497313
POM121C	3.77722	1.06439e-05	0.49729	0
WIBG	-3.86084	1.06865e-05	0	0.497116
UNC13B	-1.81562	1.06875e-05	0	0.497112
ZNF676	1.04389	1.07279e-05	0.496949	0
CTPS	2.81016	1.07363e-05	0.496915	0
TLE6	-1.4597	1.0743e-05	0	0.496887
DTYMK	2.67796	1.08896e-05	0.496299	0
SPRY4	-2.04425	1.08939e-05	0	0.496282
TOMM34	3.51306	1.09757e-05	0.495957	0
C9orf68	-1.48961	1.09773e-05	0	0.49595
COPS6	3.8931	1.09999e-05	0.495861	0
C21orf91	2.45935	1.10187e-05	0.495787	0
CXXC4	-1.15788	1.10879e-05	0	0.495515
C12orf57	-2.43543	1.10981e-05	0	0.495475
HK2	1.56762	1.11003e-05	0.495466	0
SMARCD3	-1.87856	1.1107e-05	0	0.49544
C8orf34	-1.04467	1.11191e-05	0	0.495393
C14orf143	1.69315	1.11252e-05	0.495369	0
FBXL18	2.2333	1.11431e-05	0.495299	0
PPP1R3G	1.37195	1.12191e-05	0.495004	0
PYCR2	-3.76451	1.12684e-05	0	0.494814
SGCE	1.6722	1.13306e-05	0.494575	0
TMED10	-4.00207	1.13404e-05	0	0.494537
DERL2	-3.44925	1.13771e-05	0	0.494397
PTPRB	-1.78605	1.14146e-05	0	0.494254
C7orf61	1.77164	1.14994e-05	0.493932	0
RAP2C	3.7093	1.15197e-05	0.493856	0
ZMYND17	-2.87299	1.15361e-05	0	0.493794
C14orf167	-2.5987	1.16108e-05	0	0.493514
CLDN23	-2.01799	1.16273e-05	0	0.493452
QARS	-4.43238	1.168e-05	0	0.493256
ANKRD13C	4.18056	1.16931e-05	0.493207	0
DIS3L2	-4.65005	1.17816e-05	0	0.49288
CTNND2	-0.565776	1.19096e-05	0	0.49241
ZBED2	1.21977	1.19172e-05	0.492383	0
RFC3	2.53862	1.19711e-05	0.492186	0
FURIN	-1.53524	1.19725e-05	0	0.492182
UTP18	4.03109	1.20083e-05	0.492052	0
TMEM87A	-3.30031	1.2051e-05	0	0.491898
PLA2G1B	-0.754252	1.20764e-05	0	0.491806
AKIRIN1	4.11022	1.20827e-05	0.491784	0
HARS	-4.70784	1.22472e-05	0	0.491196
TMEM51	2.45802	1.23025e-05	0.491001	0
C7orf60	2.94282	1.23035e-05	0.490997	0
TMEM132E	-1.2649	1.23329e-05	0	0.490893
CDH26	-0.89231	1.24447e-05	0	0.490501
C5orf55	2.09097	1.24856e-05	0.490359	0
GLS2	-1.21947	1.24879e-05	0	0.490351
BMX	-1.28562	1.2492e-05	0	0.490337
SLC25A40	2.6137	1.25247e-05	0.490223	0
EFNA1	-1.9529	1.25593e-05	0	0.490103
FAM3C	2.11282	1.2587e-05	0.490008	0
FCGRT	-2.67495	1.25875e-05	0	0.490006
BCL10	2.98731	1.26211e-05	0.48989	0
TMEM63A	-2.51946	1.26821e-05	0	0.489681
MAP6	-1.52578	1.27138e-05	0	0.489572
SEC22B	4.04726	1.27169e-05	0.489562	0
CRIPAK	-1.70131	1.27919e-05	0	0.489307
CHORDC1	3.05798	1.28542e-05	0.489095	0
ARL8A	-4.03135	1.28975e-05	0	0.488949
ABCF3	5.00768	1.29404e-05	0.488805	0
FAAH	-2.13626	1.29798e-05	0	0.488673
CEP135	3.20583	1.30006e-05	0.488604	0
LOC150622	-0.971383	1.31025e-05	0	0.488265
FAM19A5	-1.23169	1.31054e-05	0	0.488255
ICA1	-2.47147	1.32345e-05	0	0.487829
PDP1	2.26065	1.32428e-05	0.487802	0
PLIN2	1.66967	1.34229e-05	0.487215	0
RPS24	-2.61587	1.34236e-05	0	0.487213
BBX	3.00712	1.34532e-05	0.487117	0
PSMD11	3.18684	1.34839e-05	0.487019	0
ACADVL	-2.80879	1.35118e-05	0	0.486929
GGT6	-0.723886	1.36086e-05	0	0.486619
SPIRE2	-1.67022	1.36131e-05	0	0.486604
WASF2	3.56324	1.36624e-05	0.486447	0
GRAPL	-1.92132	1.37773e-05	0	0.486084
RPS16	-2.27819	1.39073e-05	0	0.485676
FAM115C	1.89518	1.40085e-05	0.485361	0
CLEC6A	1.38203	1.40619e-05	0.485196	0
NTHL1	-2.43123	1.4064e-05	0	0.485189
NUDT18	-2.4718	1.41195e-05	0	0.485018
TBC1D1	2.29134	1.41719e-05	0.484857	0
PGAM4	2.46893	1.41761e-05	0.484844	0
C7orf64	4.20317	1.42018e-05	0.484766	0
CMAH	-1.41806	1.42159e-05	0	0.484722
BCAS1	-0.711476	1.42849e-05	0	0.484512
DPY19L2P2	1.31521	1.43279e-05	0.484382	0
PPIL4	5.06453	1.43805e-05	0.484223	0
SLFN11	1.81255	1.44978e-05	0.48387	0
TAF2	3.47216	1.45751e-05	0.483639	0
MAGEA5	1.82708	1.46965e-05	0.483279	0
CARNS1	-1.3592	1.47413e-05	0	0.483146
PAM	-2.27808	1.47585e-05	0	0.483096
ORM1	-0.695416	1.4815e-05	0	0.48293
SUPT16H	3.78674	1.4881e-05	0.482737	0
FBXL15	-2.7751	1.5002e-05	0	0.482385
RASAL1	-1.09073	1.50244e-05	0	0.48232
IP6K2	-3.9472	1.50722e-05	0	0.482182
KLHDC2	-3.2363	1.50923e-05	0	0.482124
GCC1	4.02976	1.52104e-05	0.481786	0
MRP63	-3.02115	1.52159e-05	0	0.48177
VBP1	3.47198	1.52286e-05	0.481734	0
KIF3C	1.4304	1.52809e-05	0.481585	0
LYPLAL1	-2.80892	1.54906e-05	0	0.480993
HSD11B2	-1.41524	1.55036e-05	0	0.480957
TBC1D19	-2.44847	1.55681e-05	0	0.480777
C12orf62	-2.91296	1.5644e-05	0	0.480565
TMED3	-2.47149	1.56557e-05	0	0.480533
ANAPC16	-3.49398	1.5682e-05	0	0.48046
DHX57	4.44636	1.57237e-05	0.480344	0
MAGOH	4.02741	1.57929e-05	0.480154	0
SFTPA2	-0.584863	1.58271e-05	0	0.48006
PIP5K1B	-1.21852	1.58635e-05	0	0.47996
SLC46A3	-1.94944	1.59035e-05	0	0.479851
HDAC11	-2.66065	1.59538e-05	0	0.479714
ENC1	-2.09738	1.5993e-05	0	0.479607
CHMP1B	-2.80447	1.60118e-05	0	0.479556
C16orf45	-1.51508	1.60652e-05	0	0.479411
EFCAB4A	-1.46751	1.60725e-05	0	0.479392
RNPEP	-3.4622	1.61213e-05	0	0.47926
PSMB9	1.50925	1.6129e-05	0.479239	0
PHF17	-2.24185	1.61662e-05	0	0.479139
VANGL1	2.93482	1.61722e-05	0.479123	0
MRPL43	-3.56942	1.62191e-05	0	0.478997
TMEM115	-4.46953	1.6266e-05	0	0.478872
FPR3	1.50301	1.63002e-05	0.478781	0
FN1	1.46684	1.65428e-05	0.478139	0
EMCN	-1.54233	1.65919e-05	0	0.47801
NOTCH2	2.30694	1.66988e-05	0.477732	0
SOX8	-1.19067	1.66993e-05	0	0.47773
ZNF718	2.41178	1.68177e-05	0.477423	0
TMEM182	2.71313	1.68349e-05	0.477379	0
FAM73A	2.78064	1.68473e-05	0.477347	0
C16orf58	-2.98083	1.68686e-05	0	0.477292
GFRA3	-0.603442	1.69769e-05	0	0.477014
TMEM98	-1.79221	1.69898e-05	0	0.476981
ZSCAN21	3.29157	1.70678e-05	0.476782	0
BCAS2	3.7623	1.71242e-05	0.476639	0
C17orf59	-3.49518	1.71801e-05	0	0.476498
PCDH20	-0.807616	1.72109e-05	0	0.47642
ST6GALNAC6	-2.81339	1.73033e-05	0	0.476187
CSF1	1.67944	1.73393e-05	0.476097	0
WNT9B	-1.80131	1.74609e-05	0	0.475793
SLFNL1	-1.20707	1.75322e-05	0	0.475616
MIA3	-3.31517	1.75606e-05	0	0.475546
MAP4K2	2.5912	1.76185e-05	0.475403	0
POLE	2.5225	1.76342e-05	0.475364	0
EIF2S2	4.33195	1.76663e-05	0.475286	0
NEURL3	1.1924	1.7736e-05	0.475114	0
ZBTB16	-0.818636	1.77909e-05	0	0.47498
LONRF2	-1.01206	1.77921e-05	0	0.474977
ADIPOR1	-4.29968	1.78052e-05	0	0.474945
FLJ36031	2.27035	1.78541e-05	0.474826	0
PIK3R4	3.88569	1.78594e-05	0.474813	0
MAP7D3	1.63292	1.7903e-05	0.474707	0
MLYCD	-3.19298	1.79876e-05	0	0.474503
DAAM2	-1.1949	1.80039e-05	0	0.474463
C17orf108	-2.373	1.81037e-05	0	0.474223
BCAR3	1.91391	1.81736e-05	0.474056	0
SF3A3	5.48518	1.81898e-05	0.474017	0
INO80C	-3.2536	1.8193e-05	0	0.474009
MTMR7	-1.09096	1.82681e-05	0	0.473831
LILRB4	1.32985	1.82744e-05	0.473816	0
ZSCAN18	1.65426	1.82908e-05	0.473777	0
FRAT2	-2.51468	1.83422e-05	0	0.473655
MGRN1	-2.96247	1.83506e-05	0	0.473635
BRCC3	3.78657	1.85858e-05	0.473082	0
ZNF212	4.01101	1.86187e-05	0.473005	0
HDAC2	3.51374	1.86203e-05	0.473001	0
CNIH2	1.34459	1.86253e-05	0.47299	0
CHIA	-0.606624	1.86985e-05	0	0.472819
COPB2	3.90826	1.87181e-05	0.472774	0
RAB40B	-2.1166	1.89646e-05	0	0.472206
BCDIN3D	-3.24476	1.90201e-05	0	0.472079
KCNK17	-1.07381	1.90326e-05	0	0.47205
SSX2IP	2.20861	1.90426e-05	0.472027	0
2017-09-03	1.10185	1.90551e-05	0.471999	0
ERGIC1	-2.88552	1.90831e-05	0	0.471935
FAM18B2	-3.04305	1.91067e-05	0	0.471881
TMEM140	3.12593	1.91232e-05	0.471844	0
CDCA7	1.23563	1.91374e-05	0.471812	0
ISOC1	-3.16307	1.92025e-05	0	0.471664
BUD13	4.85891	1.92076e-05	0.471653	0
PPARG	1.18261	1.92105e-05	0.471646	0
FCGR1C	1.4667	1.92131e-05	0.47164	0
NUP153	3.544	1.9214e-05	0.471638	0
RAD9B	2.71358	1.92253e-05	0.471613	0
ALDH3B1	-1.39012	1.92698e-05	0	0.471512
CMTM3	1.95836	1.93207e-05	0.471398	0
C17orf61	-2.18895	1.93234e-05	0	0.471392
GMPPB	-3.59192	1.9345e-05	0	0.471343
DNAJB4	2.01017	1.96787e-05	0.4706	0
C17orf91	-2.19737	1.96809e-05	0	0.470595
ABCA3	-1.03335	1.96884e-05	0	0.470579
UBE4A	3.94731	1.97159e-05	0.470518	0
A2BP1	-0.96316	1.97317e-05	0	0.470483
TTC19	-3.26759	1.97428e-05	0	0.470459
DNAJC15	-1.99366	1.98557e-05	0	0.470211
HIST1H3B	2.10701	1.99551e-05	0.469995	0
TFAP2A	1.00894	1.99862e-05	0.469927	0
ACTR3	3.74865	2.00165e-05	0.469861	0
GBP4	1.47217	2.01038e-05	0.469672	0
TNNT1	0.545361	2.01378e-05	0.469599	0
CHDH	-1.68147	2.03335e-05	0	0.469179
GPM6B	-1.44206	2.03642e-05	0	0.469113
NCK1	3.05285	2.04082e-05	0.46902	0
RUFY1	-3.90031	2.0471e-05	0	0.468886
CKAP5	3.02973	2.04795e-05	0.468868	0
C6orf176	-0.49795	2.04957e-05	0	0.468834
ZNF238	-1.89185	2.05071e-05	0	0.46881
SAP130	4.59275	2.06046e-05	0.468604	0
CCDC48	-1.45994	2.06303e-05	0	0.468549
NAB1	3.37068	2.08523e-05	0.468085	0
ETFB	-2.73899	2.08944e-05	0	0.467997
CDKN2C	2.25018	2.09765e-05	0.467827	0
FCGR1A	1.36082	2.09807e-05	0.467818	0
ZNF793	1.4751	2.10296e-05	0.467717	0
VWA2	-1.23173	2.11678e-05	0	0.467432
GGH	1.25437	2.13146e-05	0.467132	0
BAG1	-2.23085	2.13365e-05	0	0.467088
ROBLD3	-2.79275	2.13802e-05	0	0.466999
MRPL23	-2.96523	2.13878e-05	0	0.466983
C8orf55	-2.24819	2.14019e-05	0	0.466955
ALOX12P2	-0.767776	2.14523e-05	0	0.466853
RIPK2	2.39502	2.14756e-05	0.466805	0
ASB8	-4.89206	2.15202e-05	0	0.466715
C1RL	-3.27563	2.15573e-05	0	0.466641
LIG1	2.93892	2.16657e-05	0.466423	0
CCNYL1	3.33513	2.1683e-05	0.466388	0
CCNH	-3.65638	2.18408e-05	0	0.466073
PDZD7	1.2219	2.18517e-05	0.466051	0
TBX2	-1.72843	2.18953e-05	0	0.465965
SOX14	-1.14752	2.19999e-05	0	0.465758
ST6GAL2	-0.870013	2.20194e-05	0	0.465719
MPP2	1.17664	2.20603e-05	0.465639	0
UOX	-1.85305	2.20715e-05	0	0.465617
FAM84A	-1.08611	2.23525e-05	0	0.465067
GTDC1	3.2805	2.24544e-05	0.46487	0
SUN3	1.28032	2.25395e-05	0.464706	0
SH3BGRL2	-1.58547	2.2584e-05	0	0.46462
ZNF100	2.29458	2.26841e-05	0.464428	0
ACSM3	-1.20687	2.27194e-05	0	0.46436
psiTPTE22	-0.808562	2.27532e-05	0	0.464296
DUOX2	-0.900918	2.29727e-05	0	0.463879
MTOR	3.64861	2.30495e-05	0.463734	0
POLA1	3.00184	2.30532e-05	0.463727	0
C7orf65	4.27996	2.30884e-05	0.463661	0
GRIN2A	-0.763267	2.31017e-05	0	0.463636
LZIC	3.57505	2.31491e-05	0.463547	0
PGM1	2.93298	2.31734e-05	0.463501	0
PLAC9	-1.35958	2.32018e-05	0	0.463448
BACE2	-1.28505	2.32651e-05	0	0.46333
PRPF19	4.43179	2.33796e-05	0.463116	0
TOMM70A	4.04629	2.33835e-05	0.463109	0
ODF3B	-1.77224	2.33906e-05	0	0.463096
SHISA2	-0.79472	2.34245e-05	0	0.463033
C17orf97	-1.53607	2.34532e-05	0	0.46298
ZNF416	2.9741	2.34568e-05	0.462973	0
GEMIN8P4	2.09832	2.34573e-05	0.462972	0
RPS4X	-2.77647	2.35716e-05	0	0.462761
DDN	1.2389	2.36683e-05	0.462583	0
ZDHHC3	-3.1669	2.37073e-05	0	0.462512
FBXO10	2.73247	2.37232e-05	0.462483	0
MEIS3P1	-2.58513	2.37347e-05	0	0.462462
PPP1R1A	-0.962866	2.37397e-05	0	0.462453
RTCD1	3.74904	2.38213e-05	0.462304	0
POLL	-4.18783	2.38241e-05	0	0.462298
IDS	2.22513	2.3991e-05	0.461995	0
BAI1	-0.783424	2.40001e-05	0	0.461979
PURB	4.03679	2.41242e-05	0.461755	0
NETO2	1.68128	2.42203e-05	0.461582	0
MSL3L2	1.38406	2.42822e-05	0.461471	0
IL1B	1.24837	2.429e-05	0.461457	0
PKP1	-0.5669	2.43414e-05	0	0.461365
CBR1	-1.27597	2.43494e-05	0	0.461351
KLRC2	1.06434	2.43884e-05	0.461282	0
ANKRD34B	0.678541	2.44448e-05	0.461181	0
HNRNPR	4.77945	2.44565e-05	0.461161	0
ZCWPW2	-2.08637	2.46207e-05	0	0.46087
RPL4	-3.00017	2.46229e-05	0	0.460866
KLC4	-2.63791	2.46501e-05	0	0.460818
FOXS1	-1.72286	2.46775e-05	0	0.46077
EFHA1	-3.79833	2.47626e-05	0	0.46062
TNFRSF9	1.13418	2.50222e-05	0.460168	0
OSBPL5	-1.84176	2.50404e-05	0	0.460136
LMBRD2	1.98157	2.50704e-05	0.460084	0
CTSC	2.2113	2.51146e-05	0.460007	0
RUFY3	-2.95764	2.51539e-05	0	0.459939
OSBPL11	3.68579	2.5338e-05	0.459623	0
EIF3L	-3.51758	2.54034e-05	0	0.459511
GMPR	-1.54691	2.54391e-05	0	0.45945
FOXO1	-2.07067	2.55313e-05	0	0.459293
TMEM41B	-3.03923	2.55477e-05	0	0.459265
RGS20	0.908238	2.55486e-05	0.459263	0
TMEM200B	1.41556	2.57688e-05	0.458891	0
EDA	-1.1126	2.59244e-05	0	0.458629
TMEM219	-2.96173	2.59511e-05	0	0.458584
CABC1	-2.2083	2.61347e-05	0	0.458278
HSPB11	3.11911	2.63441e-05	0.457932	0
SUN1	3.60376	2.63621e-05	0.457902	0
TSPAN33	1.67814	2.65272e-05	0.457631	0
MCF2L	-1.43228	2.65672e-05	0	0.457566
ARFIP2	-3.27996	2.6593e-05	0	0.457523
FDFT1	-2.47133	2.67037e-05	0	0.457343
C3orf1	3.67206	2.6715e-05	0.457324	0
EXOSC2	3.81418	2.67733e-05	0.45723	0
FGF11	1.13248	2.67808e-05	0.457218	0
SFTPA1	-0.552989	2.68066e-05	0	0.457176
NRIP1	2.31886	2.68582e-05	0.457092	0
PNMA1	2.5791	2.68645e-05	0.457082	0
TCTN1	-2.50176	2.69173e-05	0	0.456997
LRP3	-1.60159	2.70519e-05	0	0.45678
CHCHD5	-2.64955	2.70703e-05	0	0.456751
HPSE	1.6576	2.70769e-05	0.45674	0
C11orf49	-2.73392	2.71001e-05	0	0.456703
LOC400794	-0.947212	2.7203e-05	0	0.456538
RIMS2	0.741938	2.7285e-05	0.456408	0
PADI1	0.704135	2.7389e-05	0.456242	0
TMEM132C	-1.06307	2.74695e-05	0	0.456115
CECR6	1.63574	2.74975e-05	0.456071	0
SLC5A9	-1.02433	2.75684e-05	0	0.455959
DOCK11	1.70357	2.77329e-05	0.4557	0
C15orf23	2.15623	2.77338e-05	0.455699	0
COPS7B	4.46162	2.7797e-05	0.4556	0
GLYCTK	-1.87703	2.78429e-05	0	0.455529
RPL26	-2.43292	2.78493e-05	0	0.455519
ACTN1	2.39747	2.79849e-05	0.455308	0
GNB1	4.8075	2.80019e-05	0.455281	0
TSN	4.85024	2.81258e-05	0.45509	0
CTSE	-0.63091	2.82022e-05	0	0.454972
HMGCS2	-0.628332	2.82472e-05	0	0.454903
PCDH7	1.01199	2.8262e-05	0.45488	0
TSTD1	-1.89857	2.83162e-05	0	0.454797
KHSRP	3.6943	2.83219e-05	0.454788	0
GRB2	4.79108	2.84151e-05	0.454645	0
FAM165B	-2.54815	2.84176e-05	0	0.454641
CNOT8	-3.10746	2.84194e-05	0	0.454639
PFN4	1.56584	2.84564e-05	0.454582	0
RSC1A1	3.07662	2.85605e-05	0.454423	0
UMPS	3.60088	2.85715e-05	0.454407	0
ZNF259	3.73663	2.8573e-05	0.454404	0
ZNF12	3.84883	2.86186e-05	0.454335	0
COX18	-3.18709	2.87422e-05	0	0.454148
CYP2R1	-2.81275	2.89512e-05	0	0.453833
LIMCH1	-1.74506	2.90373e-05	0	0.453704
ZNF498	4.28791	2.912e-05	0.453581	0
FAM55C	2.09071	2.91647e-05	0.453514	0
C11orf16	-0.793588	2.92212e-05	0	0.45343
LOC145837	-0.56069	2.92299e-05	0	0.453417
SH3BP2	2.91167	2.92913e-05	0.453326	0
GDAP2	4.15475	2.94294e-05	0.453122	0
SYDE2	1.64632	2.94771e-05	0.453052	0
SFTA3	-0.952168	2.96312e-05	0	0.452825
ATPAF2	-3.42112	2.98179e-05	0	0.452552
NDUFA2	-2.46796	2.98543e-05	0	0.452499
NDUFV2	-2.78622	2.9886e-05	0	0.452453
VPS8	4.12025	2.99644e-05	0.452339	0
SSB	4.49125	3.0007e-05	0.452278	0
MKRN3	0.823044	3.00587e-05	0.452203	0
RPL10	-2.97232	3.02635e-05	0	0.451908
EYA3	2.6303	3.04832e-05	0.451594	0
H2AFZ	2.73869	3.04913e-05	0.451582	0
MTERF	3.52303	3.05039e-05	0.451564	0
CXCR2P1	0.910504	3.05825e-05	0.451453	0
FBXW5	-2.85816	3.06696e-05	0	0.451329
ZNF382	1.57259	3.15124e-05	0.450152	0
ART3	2.10387	3.1514e-05	0.45015	0
GOLGA6L6	-1.31691	3.16052e-05	0	0.450024
FRK	2.06204	3.17139e-05	0.449875	0
STK38	3.38528	3.17171e-05	0.449871	0
SPDEF	-0.902858	3.17621e-05	0	0.449809
MTCH1	4.09157	3.18463e-05	0.449694	0
PPP1R1B	-0.655879	3.18787e-05	0	0.44965
TJP3	-1.82917	3.20129e-05	0	0.449467
IFI44	1.30051	3.21785e-05	0.449243	0
ZFYVE28	-1.9157	3.22015e-05	0	0.449212
ZBTB7C	-0.990734	3.23231e-05	0	0.449049
GMEB1	4.36108	3.23488e-05	0.449014	0
NEO1	-1.7103	3.26178e-05	0	0.448655
RAB32	2.11527	3.26303e-05	0.448638	0
TMEM220	-1.58245	3.26338e-05	0	0.448633
FXC1	-3.85187	3.28417e-05	0	0.448357
SLC35C1	-2.35854	3.28445e-05	0	0.448354
PCK1	-0.741534	3.29619e-05	0	0.448199
ANKRD29	-0.964209	3.29671e-05	0	0.448192
ESD	-3.68709	3.29919e-05	0	0.448159
DFFA	4.16644	3.2994e-05	0.448156	0
CSAG3	0.696582	3.30249e-05	0.448116	0
GAL3ST1	-0.988951	3.30804e-05	0	0.448043
ITSN1	2.9449	3.31703e-05	0.447925	0
SNX10	1.56153	3.33054e-05	0.447749	0
LOC441666	0.87958	3.34279e-05	0.447589	0
CCL4L2	1.22083	3.36504e-05	0.447301	0
VAV3	1.32021	3.38443e-05	0.447051	0
TRA2B	5.69718	3.38757e-05	0.447011	0
EIF3CL	-3.23719	3.38919e-05	0	0.44699
PADI3	0.903299	3.40034e-05	0.446848	0
PXMP4	-1.53065	3.43302e-05	0	0.446432
SP3	4.40676	3.44593e-05	0.446269	0
CYB561D2	-3.16439	3.49437e-05	0	0.445663
RGP1	2.4258	3.50297e-05	0.445556	0
DNAJC8	4.89338	3.50669e-05	0.44551	0
GAS8	-2.74073	3.51674e-05	0	0.445386
RRP1B	3.89182	3.52106e-05	0.445333	0
UBTD1	-2.18942	3.52374e-05	0	0.4453
PHF11	-3.48364	3.52643e-05	0	0.445266
ZDHHC18	3.31428	3.5369e-05	0.445138	0
DRAM1	-1.55824	3.55073e-05	0	0.444968
[truncated: 18,505 more rows]

## Sheet: Suppl. Table S3
Suppl. Table S3: GO terms and KEGG pathways enrichment in genes diffeerntially expressed between P53-mutant and wild-type LUAD samples.
Up-regulated Genes
Category	Term	Geneset Size	Count	Fold Enrichment	PValue	FDR
KEGG_PATHWAY	hsa04110:Cell cycle	125	53	5.95591	2.4772e-28	2.96497e-25
GOTERM_MF_FAT	GO:0032553~ribonucleotide binding	1836	233	1.76784	4.23862e-20	6.62106e-17
GOTERM_MF_FAT	GO:0032555~purine ribonucleotide binding	1836	233	1.76784	4.23862e-20	6.62106e-17
KEGG_PATHWAY	hsa03030:DNA replication	36	25	9.75483	7.10041e-20	8.49849e-17
GOTERM_MF_FAT	GO:0017076~purine nucleotide binding	1918	237	1.72131	5.5836e-19	8.72201e-16
GOTERM_MF_FAT	GO:0005524~ATP binding	1477	191	1.80141	4.17903e-17	6.52797e-14
GOTERM_MF_FAT	GO:0000166~nucleotide binding	2245	259	1.6071	1.74474e-16	3.44169e-13
GOTERM_MF_FAT	GO:0032559~adenyl ribonucleotide binding	1497	191	1.77734	2.80607e-16	5.21805e-13
GOTERM_MF_FAT	GO:0030554~adenyl nucleotide binding	1577	195	1.72251	3.68375e-15	5.71765e-12
GOTERM_MF_FAT	GO:0001883~purine nucleoside binding	1601	196	1.70539	8.57184e-15	1.3356e-11
GOTERM_MF_FAT	GO:0001882~nucleoside binding	1612	197	1.70239	8.65998e-15	1.35225e-11
GOTERM_MF_FAT	GO:0003677~DNA binding	2331	247	1.47609	1.72345e-11	2.69215e-08
GOTERM_MF_FAT	GO:0004386~helicase activity	140	31	3.08456	4.51795e-08	7.05739e-05
KEGG_PATHWAY	hsa03440:Homologous recombination	28	13	6.5218	1.47268e-07	0.000176265
GOTERM_MF_FAT	GO:0008094~DNA-dependent ATPase activity	57	18	4.39903	2.74025e-07	0.000428047
KEGG_PATHWAY	hsa04114:Oocyte meiosis	110	25	3.19249	4.60699e-07	0.00055141
GOTERM_MF_FAT	GO:0016887~ATPase activity	334	51	2.12708	4.92125e-07	0.000768735
GOTERM_MF_FAT	GO:0003697~single-stranded DNA binding	55	17	4.30572	8.93281e-07	0.00139537
GOTERM_MF_FAT	GO:0043566~structure-specific DNA binding	145	29	2.78605	1.20181e-06	0.00187731
KEGG_PATHWAY	hsa03430:Mismatch repair	23	11	6.71811	1.426e-06	0.00170677
GOTERM_MF_FAT	GO:0003684~damaged DNA binding	50	15	4.17908	7.0547e-06	0.0110194
GOTERM_MF_FAT	GO:0003777~microtubule motor activity	77	18	3.25642	2.45996e-05	0.0384196
Down-regulated Genes Table Sxxx: GO terms and KEGG pathwyas enrichmend in genes up-regulated in p53-mutant LUAD samples.
Category	Term	Geneset Size	Count	Fold Enrichment	PValue	FDR
KEGG_PATHWAY	hsa03010:Ribosome	87	25	4.41452	5.47545e-10	6.67996e-07
GOTERM_MF_FAT	GO:0003735~structural constituent of ribosome	168	32	3.15428	1.94102e-08	3.05323e-05
Suppl. Table S3.
GO terms and KEGG pathways enrichment in genes differentially expressed between P53-mutant and wild-type LUAD samples. For each enrichment term of up-regulated genes and down-regulated genes in the P53-mutant LUAD samples, its category, geneset size, number of overlapped genes in the P53-mutat samples, enrichment ratio, P-value and FDR are provided.
